1                   **Cumulative impacts across Australia’s Great Barrier Reef:**

2                                   **A mechanistic evaluation**

3  
4           Yves-Marie Bozec<sup>1</sup>, Karlo Hock<sup>1</sup>, Robert A. B. Mason<sup>1</sup>, Mark E. Baird<sup>2</sup>, Carolina Castro-  
5           Sanguino<sup>1</sup>, Scott A. Condie<sup>2</sup>, Marji Puotinen<sup>3</sup>, Angus Thompson<sup>4</sup>, Peter J. Mumby<sup>1</sup>

6   <sup>1</sup> Marine Spatial Ecology Lab, School of Biological Sciences & ARC Centre of Excellence for  
7   Coral Reef Studies, University of Queensland, St Lucia, Qld 4072, Australia.

8   <sup>2</sup> CSIRO Oceans and Atmosphere, Hobart, Tasmania, Australia

9   <sup>3</sup> Australian Institute of Marine Science & Indian Ocean Marine Research Centre, Crawley, WA  
10  6009, Australia.

11  <sup>4</sup> Australian Institute of Marine Science, Townsville, QLD 4810, Australia.

12  
13  **Corresponding author:** Dr Yves-Marie Bozec

14  Marine Spatial Ecology Lab, Goddard Building, School of Biological Sciences

15  The University of Queensland, St Lucia, Qld 4072, Australia

16  E-mail: [y.bozec@uq.edu.au](mailto:y.bozec@uq.edu.au)

17 **ABSTRACT**

18 Cumulative impacts assessments on marine ecosystems have been hindered by the difficulty of  
19 collecting environmental data and identifying drivers of community dynamics beyond local scales. On  
20 coral reefs, an additional challenge is to disentangle the relative influence of multiple drivers that operate  
21 at different stages of coral ontogeny. We integrated coral life history, population dynamics and spatially-  
22 explicit environmental drivers to assess the relative and cumulative impacts of multiple stressors across  
23 2,300 km of the world's largest coral reef ecosystem, Australia's Great Barrier Reef (GBR). Using  
24 literature data, we characterized relationships between coral life history processes (reproduction, larval  
25 dispersal, recruitment, growth and mortality) and environmental variables. We then simulated coral  
26 demographics and stressor impacts at the organism (coral colony) level on >3,800 individual reefs linked  
27 by larval connectivity, and exposed to temporally- and spatially-realistic regimes of acute (crown-of-  
28 thorns starfish outbreaks, cyclones and mass coral bleaching) and chronic (water quality) stressors. Model  
29 simulations produced a credible reconstruction of recent (2008–2020) coral trajectories consistent with  
30 monitoring observations, while estimating the impacts of each stressor at reef and regional scales.  
31 Overall, corals declined by one third across the GBR, from an average ~29% to ~19% hard coral cover.  
32 By 2020, less than 20% of the GBR had coral cover higher than 30%. Global annual rates of coral  
33 mortality were driven by bleaching (48%) ahead of cyclones (41%) and starfish predation (11%). Beyond  
34 the reconstructed status and trends, the model enabled the emergence of complex interactions that  
35 compound the effects of multiple stressors while promoting a mechanistic understanding of coral cover  
36 dynamics. Drivers of coral cover growth were identified; notably, water quality (suspended sediments)  
37 was estimated to delay recovery for at least 25% of inshore reefs. Standardized rates of coral loss and  
38 recovery allowed the integration of all cumulative impacts to determine the equilibrium cover for each  
39 reef. This metric, combined with maps of impacts, recovery potential, water quality thresholds and reef  
40 state metrics, facilitates strategic spatial planning and resilience-based management across the GBR.

41 **KEYWORDS**

42 Coral populations, life history, individual-based model, spatial simulations, disturbances, resilience,  
43 strategic management.

## 44 INTRODUCTION

45 The increasing threats faced by marine ecosystems compels us to better understand the cumulative  
46 impacts of multiple pressures on species and habitats. Yet, progress towards assessment of multiple  
47 stressors has been hindered by the difficulty of characterizing biological responses across ecological  
48 scales (Crain et al. 2008, Hodgson and Halpern 2019). Responses to a particular stressor can be complex  
49 (e.g., indirect, nonlinear), variable in space and time, and compounded with other stressors or ecological  
50 processes (Paine et al. 1998, Darling and Côté 2008). Moreover, one stressor can affect specific life-  
51 stages or demographic processes that make interactions with other stressors difficult to detect. Integrated  
52 approaches to cumulative impact assessment are required to better predict the ecosystem-level effects of  
53 multiple stressors and provide enhanced guidance for the strategic planning and spatial prioritization of  
54 management interventions (Halpern and Fujita 2013, Hodgson and Halpern 2019).

55 The impacts of multiple stressors can be particularly difficult to predict in biogenic habitats (e.g. coral  
56 reefs, kelp forests) where acute and chronic pressures simultaneously affect the reproduction, growth and  
57 mortality of habitat forming species (Harborne et al. 2017, Filbee-Dexter and Wernberg 2018). This is  
58 especially challenging on coral reefs which are deteriorating worldwide due to the compounded effects of  
59 natural disturbances with accelerating anthropogenic pressures (Hoegh-Guldberg et al. 2007, Hughes et  
60 al. 2017). Whereas extensive coral loss can be easily attributed to acute stressors such as tropical storms,  
61 coral bleaching and outbreaks of coral predators (Hughes and Connell 1999, De'ath et al. 2012),  
62 identifying the causes of hindered coral recovery is more difficult (Graham et al. 2011, 2015, Osborne et  
63 al. 2017, Ortiz et al. 2018). Slow regeneration of coral populations can result from the dysfunction of a  
64 range of early-life processes, including reproduction, larval dispersal, settlement and post-settlement  
65 growth and mortality (Hughes and Connell 1999, Hughes et al. 2011). The underlying causes can be  
66 multiple – such as macroalgal overgrowth, excess sediment and nutrient from land run-off, light reduction  
67 in turbid waters (Hughes et al. 2003, Fabricius 2005, Mumby and Steneck 2008, Jones et al. 2015, Evans  
68 et al. 2020) – and attribution can be difficult without surveying the relevant life-history stages. Moreover,  
69 response to stressors vary among coral species (Loya et al. 2001, Darling et al. 2013) and can lead to  
70 complex interactions whose outcomes are difficult to predict (Ban et al. 2014, Bozec and Mumby 2015).  
71 As the focus of modern reef management is on promoting local coral recovery in the face of less  
72 manageable drivers (e.g., anthropogenic climate warming), cumulative impacts assessments on coral reefs  
73 must integrate all stressors across the coral life-cycle.

74 Australia's Great Barrier Reef (GBR) exemplifies the challenge of evaluating cumulative pressures on  
75 coral reefs, despite being widely considered one of the best studied, monitored and managed reef systems  
76 in the world (GBRMPA 2019, although see Brodie and Waterhouse 2012). The GBR Marine Park  
77 stretches over 2,300 km across an area of >344,000 km<sup>2</sup>, which means that only a limited fraction of coral  
78 reefs can be monitored. Over the past three decades, average coral condition across the GBR has declined  
79 in response to the combined impacts of cyclones, outbreaks of the coral-eating crown-of-thorns starfish  
80 (*Acanthaster* spp.; CoTS), temperature-induced bleaching and poor water quality (Osborne et al. 2011,  
81 De'ath et al. 2012, Hughes et al. 2017, Schaffelke et al. 2017). Much of the research on cumulative  
82 impacts on the GBR has used time-series of coral cover to evaluate the rate and drivers of coral loss  
83 (Thompson and Dolman 2010, Osborne et al. 2011, Sweatman et al. 2011, De'ath et al. 2012, Cheal et al.

85 2017). Until recently, coral loss was mostly related to tropical storms and CoTS outbreaks (De'ath et al.  
86 2012), with occasional yet significant impacts of coral bleaching (Berkelmans et al. 2004, Hughes et al.  
87 2017). The two consecutive bleaching events in 2016 and 2017, that caused extensive coral mortality on  
88 the northern two-thirds of the GBR (Hughes et al. 2017, 2018, GBRMPA 2019), extend the relative  
89 impact and sphere of influence across the GBR. Anthropogenic climate warming and the reducing time  
90 interval between severe bleaching events are now considered a major threat for the GBR, hindering its  
91 ability to recover from other disturbances and maintain key reef functions (Schaffelke et al. 2017,  
92 GBRMPA 2019).

93 Compared to drivers of coral loss, pressures on coral recovery across the GBR are less well  
94 established. While run-off of fine sediments, nutrients and pesticides combine to affect water quality on  
95 inshore reefs (Brodie and Waterhouse 2012, Schaffelke et al. 2017, Waterhouse et al. 2017), their  
96 demographic impacts on corals remain hard to quantify, likely involving interrelated factors such as a  
97 reduction in juvenile densities, increased susceptibility to disease, macroalgal growth and enhanced  
98 survival of CoTS larvae (Fabricius and De'ath 2004, Brodie et al. 2005, Fabricius et al. 2010, Thompson  
99 et al. 2014). Analyses of monitoring data have related reductions in the rate of coral cover growth with  
100 exposure to river plumes (Ortiz et al. 2018, MacNeil et al. 2019) but the underlying mechanisms remain  
101 unclear. A number of physiological responses to water quality parameters have been established  
102 experimentally (Fabricius 2005) but quantifying the ecological effects of these responses (e.g., on coral  
103 cover) is difficult.

104 To address the challenges of capturing the impacts of multiple stressors across the GBR, several  
105 studies have taken a modeling approach whereby coral loss and recovery are integrated into statistical  
106 and/or simulation models of coral cover change (reviewed in Bozec and Mumby 2020, see also Vercelloni  
107 et al. 2017, Condie et al. 2018, Lam et al. 2018, Mellin et al. 2019). In these studies, coral population  
108 dynamics have been modeled as temporal changes in coral cover, most likely because this is the primary  
109 variable that is surveyed in monitoring programs. Although coral cover is a common metric of reef health,  
110 it does not resolve the demographic structure of corals, i.e. the relative composition of different stages or  
111 sizes. This is an important caveat because demographic changes are not necessarily reflected in changes  
112 in coral cover (Done 1995), so that impacts on a critical process (e.g. recruitment failure) may not be  
113 represented explicitly. Failure to identify which mechanisms (among partial or whole-colony mortality,  
114 recruitment or colony growth, Hughes and Tanner 2000) are implicated in coral cover change limits our  
115 ability to predict coral trajectories (Edmunds and Riegl 2020). Moreover, stress-induced coral mortality is  
116 often size-specific, and which size classes are affected will have important implications for the following  
117 rate of recovery. Accurate hindcast and forecast predictions of coral cover require a mechanistic approach  
118 by which the processes of coral gains (recruitment, colony growth) and losses (partial and whole-colony  
119 mortality) are considered explicitly at the colony level to account for size-specific and density-dependent  
120 responses.

121 We developed a mechanistic model of coral metapopulations to assess the cumulative impacts of  
122 recent multiple stressors that have affected the GBR. The model simulates the fate of individual coral  
123 colonies across > 3,800 individual reefs connected by larval dispersal while capturing some effects of  
124 water quality (suspended sediments and chlorophyll) on the early-life demographics of coral and CoTS. A  
125 reconstruction of recent (2008–2020) coral trajectories across the GBR was performed from (1) the

126 integration of mechanistic data into empirical relationships that underlie the demography of corals and  
127 CoTS; (2) the calibration of stress-induced coral mortality and recovery with observations from the GBR;  
128 (3) the simulation of coral dynamics under spatially- and temporally- realistic regimes of larval  
129 connectivity, water quality, CoTS outbreaks, cyclones and mass coral bleaching; (4) the validation of  
130 these trajectories with independent coral cover observations. We then combined statistical and simulation-  
131 based approaches to evaluate the relative contribution in space and time of each driver to the  
132 reconstructed reef response. Specifically, we asked: (1) what are the individual and combined effects of  
133 acute stressors (cyclones, CoTS and bleaching) in terms of proportional coral loss across the GBR? (2)  
134 what is the relative importance of water quality and connectivity on recovery dynamics at both local and  
135 regional scales? (3) what is the reefs' ability to sustain healthy levels of coral cover with their the current  
136 regime of acute and chronic disturbances and how does this vary in space? Finally, we develop a metric  
137 (reef *equilibrial cover*) that integrates the cumulative pressures operating on coral growth and stress-  
138 induced mortality to quantify reef resilience across the entire GBR. With this mechanistic evaluation of  
139 cumulative impacts and resilience we attempt to elucidate the main drivers of coral reef decline and  
140 provide guidance for reef monitoring and targeted management to help sustain a healthy GBR.

## 141 MATERIAL AND METHODS

### 142 Model general description

143 ReefMod (Mumby et al. 2007) is an agent-based model that simulates the settlement, growth,  
144 mortality of circular coral colonies and patches of algae over a horizontal grid lattice. With a six-month  
145 time-step, the model tracks the individual size (area in cm<sup>2</sup>) of coral colonies and algal patches affected by  
146 demographic processes, ecological interactions and acute disturbances (e.g., storms, bleaching)  
147 characteristic of a mid-depth (~5–10 m) reef environment. The model has been successfully tested against  
148 *in situ* coral dynamics both in the Caribbean (Mumby et al. 2007, Bozec et al. 2015) and the Pacific (Ortiz  
149 et al. 2014, Bozec and Mumby 2019).

150 We developed the model further to integrate coral metapopulation dynamics across a spatially-explicit  
151 representation of the multiple reef environments of the GBR (ReefMod-GBR, Fig. 1A, Appendix S1). We  
152 refined a previous parameterization of coral demographics (Ortiz et al. 2014) with recent empirical data  
153 based on three groups of acroporids (arborescent, plating and corymbose) and three non-acroporid groups,  
154 including pocilloporids, encrusting and massive corals (Appendix S2: Table S1). The model was extended  
155 with explicit mechanisms driving the early-life dynamics of corals: fecundity, larval dispersal, density-  
156 dependent settlement, juvenile growth and background (chronic) mortality, mediated by water quality and  
157 transient coral rubble. In addition, a cohort model of CoTS was developed to simulate the impact of  
158 starfish outbreaks on coral populations. Processes of coral recovery and stress-induced mortality were  
159 calibrated with regional data, leading to a realistic modeling of the key processes driving coral  
160 populations on the GBR (Fig. 1B-C). ReefMod-GBR is implemented using the MATLAB programming  
161 language.

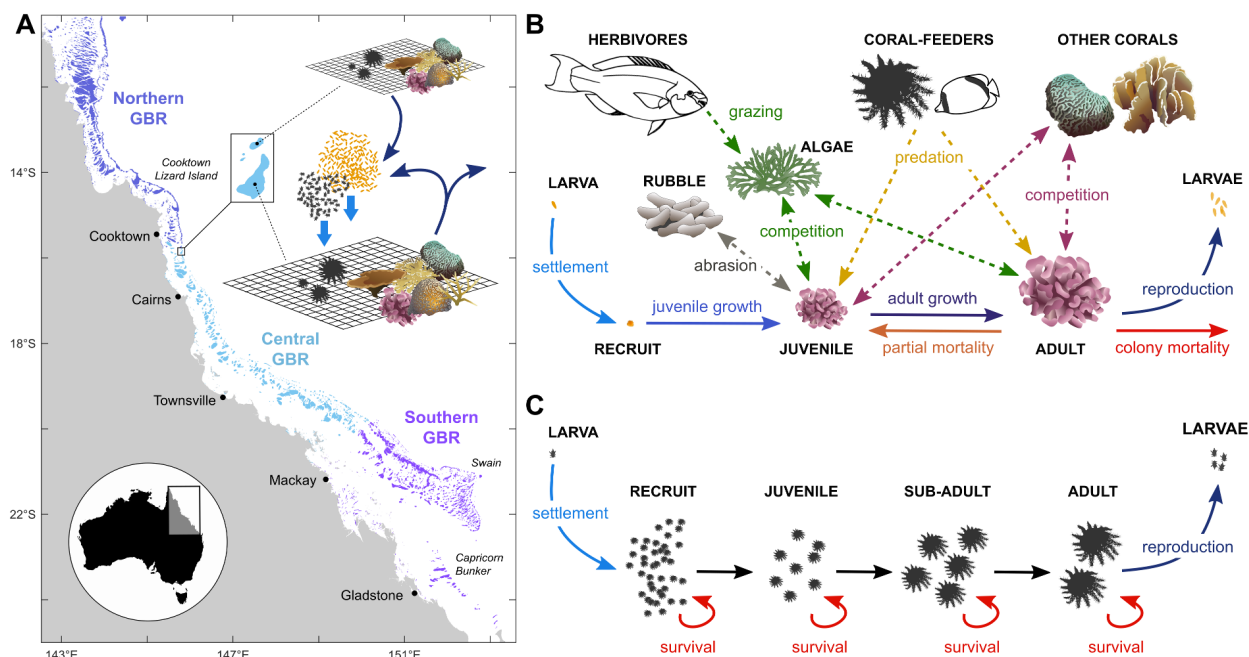

162

163 **Fig. 1.** Schematic representation of the reef ecosystem model applied to the Great Barrier Reef (ReefMod-GBR).  
 164 (A) Each of 3,806 individual reefs is represented by a 20 m × 20 m horizontal space virtually colonized by coral  
 165 colonies belonging to six morphological groups. (B) Demographic processes (solid arrows) and ecological  
 166 interactions (dashed arrows) affecting coral colonies individually. (C) Modeling of CoTS cohorts subject to size-  
 167 specific survival during their life. For both corals and CoTS, settlement occurs from a pool of larvae that results  
 168 from the retention of locally-produced offspring (self-supply) and the incoming of larvae from connected reef  
 169 populations (external supply).

### 170 *Model domain and spatial context*

171 For simulating coral dynamics along ~2,300 km length of the GBR, we used a discretization of the  
 172 GBR consisting of 3,806 individual reef patches (Hock et al. 2017) across the northern, central and  
 173 southern sections of the GBR Marine Park (Fig. 1A). A grid lattice of 20 × 20 cells, each representing  
 174 1 m<sup>2</sup> of the reef substratum, was assigned to every reef patch (hereafter referred as a *reef*) identified by a  
 175 convex polygon in the indicative reef (0–10 m) outline (GBRMPA 2007). Because larval dispersal and  
 176 environmental forcing are not consistently available at intra-reef scales, each grid lattice represents a  
 177 mean-field approximation of the ecological dynamics occurring within the environment of a defined reef  
 178 polygon. This environment is characterized by historical events of tropical storm and heat stress, and a  
 179 reconstructed regime of water quality during austral summer (wet season, from November to April) and  
 180 winter (dry season, May to October). Within-reef variability of coral demographics is implicitly included  
 181 through stochastic coral recruitment and mortality, but also temporally through probabilistic storm and  
 182 heat stress events. Uncertainty in coral and CoTS trajectories is captured by running a minimum of 40  
 183 stochastic simulations. As a result, the model is spatially explicit in three ways: 1) by simulating  
 184 individual coral colonies on a representative reefscape; 2) by linking coral demographics to their ambient  
 185 stress regime; 3) by connecting reefs in a directed network that represents larval exchanges for both corals  
 186 and CoTS.

### 187 *Larval production and transport*

188 Broadcast coral spawning on the GBR extends from October to December (Babcock et al. 1986).  
189 Following Hall and Hughes (1996), coral fecundity is a function of colony size and expressed as the total  
190 volume of reproductive outputs (Appendix S1) using species-specific parameters (Appendix S2: Table  
191 S1). Colony size at sexual maturity was fixed to 123–134 cm<sup>2</sup> for the three acroporid groups and 31–  
192 38 cm<sup>2</sup> for the other groups, based on threshold sizes above which 100% of colonies were found  
193 reproductive (Hall and Hughes 1996). The number of offspring released by each coral group during the  
194 reproductive season is estimated by summing the total volume of reproductive outputs over all gravid  
195 colonies, assuming an average egg volume of 0.1 mm<sup>3</sup> (*Acropora hyacinthus*, Hall and Hughes 1996).

196 The CoTS spawning period on the GBR extends from December to February (Babcock and Mundy  
197 1992, Brodie et al. 2017). CoTS fecundity expressed as number of eggs is a function of wet weight  
198 (Kettle and Lucas 1987) derived from the representative mean size (diameter) of each age class of CoTS.  
199 The resulting fecundity-at-age prediction is multiplied by the density of the corresponding age class to  
200 calculate the total number of offspring produced on a grid lattice. Starfish become sexually mature when  
201 they are 2 years old (Lucas 1984).

202 During a spawning season, the number of coral and CoTS offspring produced on each grid lattice is  
203 multiplied by the area of the associated reef polygon to upscale reproductive outputs to the expected  
204 population sizes. Larval dispersal is then processed from source to sink reefs using transition probabilities  
205 (Hock et al. 2017, 2019) derived from particle tracking simulations generated by a three-dimensional  
206 hydrodynamic model of the GBR (Herzfeld et al. 2016). These probabilities of larval connectivity are  
207 combined with the number of larvae produced to estimate larval supply on every sink reef. Matrices of  
208 larval connectivity were determined for designated spawning times for both corals and CoTS over the 6  
209 years for which the hydrodynamic models were available: wet seasons 2010-11, 2011-12, 2012-13, 2014-  
210 15, 2015-16, and 2016-17.

211 We note that local retention predicted by the connectivity matrices is extremely low for corals, as the  
212 relative proportion of coral larvae retained on a source reef is <0.01 for more than 95% of the 3,806 reefs.  
213 However, the empirical rates of larval retention for corals and CoTS across the GBR remain largely  
214 unknown. In a study of coral recruitment around a relatively isolated reef of the central GBR, Sammarco  
215 and Andrews (1989) observed that 70% of the coral spats collected within a 5 km radius were found  
216 within 300 m of the reef. Assuming that ~40% of the produced larvae survive and become competent for  
217 settlement 8–10 days after spawning (Connolly and Baird 2010), a rate of 0.28 was considered as a  
218 minimum retention for both corals and CoTS and added to values predicted by dispersal simulations.

### 219 *Larval supply and recruitment*

220 For a given reef, the total number of incoming coral and CoTS larvae (i.e., from external supply and  
221 retention) is divided by the area of the reef to estimate a pool of larvae  $L$  (larva/m<sup>2</sup>) available for  
222 settlement. Assuming density-dependence in early (< 6 month) post-settlement survivorship, we first  
223 estimate a density potential for settlers ( $D_{settlers}$ , settler/m<sup>2</sup>) as a Beverton-Holt (B-H) function (e.g.,  
224 Haddon 2011) of the available larval pool ( $L$ ):

225 
$$D_{settlers} = \frac{\alpha \cdot L}{\beta + L} \quad (1)$$

226 where  $\alpha$  (settler/m<sup>2</sup>) is the maximum achievable density of settlers for a 100% free space and  $\beta$  (larva/  
227 m<sup>2</sup>) is the stock of larvae required to produce half the maximum settlement. For CoTS, the actual density  
228 of 6-month-old recruits is obtained by reducing  $D_{settlers}$  to a 3% survived fraction due to intense predation  
229 (Keesing and Halford 1992, Okaji 1996). For corals, the actual number of 6-month-old recruits for each  
230 coral group is generated in each cell separately following a Poisson distribution with recruitment event  
231 rate  $\lambda$  (recruit/m<sup>2</sup>) calculated as:

232 
$$\lambda = D_{settlers} \cdot A \quad (2)$$

233 where  $A$  is the proportional space covered by cropped algal turf on a given cell, i.e., the substratum  
234 that is suitable for coral recruitment (Kuffner et al. 2006). This assumes that the probability of coral  
235 recruitment is directly proportional to available space (Connell 1997). Corals cannot recruit on sand  
236 patches, which are randomly distributed across the grid lattice at initialization (Appendix S1).

237 Recruitment parameters  $\alpha$  and  $\beta$  were determined by calibration against GBR observations from  
238 offshore (mid- and outer-shelf) reefs. For corals (calibration for CoTS is presented thereafter), we  
239 simulated coral recovery on hypothetical reefs (see details in Appendix S1) and adjusted the two  
240 parameters with the double constraint of reproducing the recovery dynamics observed after extensive  
241 coral loss (Emslie et al. 2008, Fig. 2A) while generating realistic densities of coral juveniles (Traçon et al.  
242 2013, Fig. 2B). Densities patterns of coral juveniles varied predictably along the recovery curve: first, by  
243 increasing as self-supply of larvae is enhanced by more abundant sexually-mature corals; second, by  
244 decreasing with the progressive reduction of settlement space. Recovery dynamics will likely vary with  
245 external supply, water quality and changes in coral community structure.

#### 246 *Early post-recruitment coral demographics*

247 Six-month-old coral recruits have a fixed size of 1 cm<sup>2</sup> and become juveniles at the next step if  
248 allowed to grow. Coral juveniles are defined by colony diameters below 4 cm. Their growth rate is set to  
249 1 cm/y radial extension (Doropoulos et al. 2015, 2016) until they reach 13 cm<sup>2</sup> (i.e., ~4 cm diameter, 2  
250 years old corals if no partial mortality has occurred) above which they acquire species-specific growth  
251 rate (Appendix S2: Table S1). With this parameterization, the maximum diameter of 3-year-old  
252 corymbose/small branching acroporids is 10.1 cm, which falls within the range of diameters (7.8–  
253 13.7 cm) observed for *Acropora millepora* at this age (Baria et al. 2012).

254 Background whole-colony mortality of coral juveniles is set to 0.2 per year as recorded for *Acropora*  
255 spp. at Heron Island (Doropoulos et al. 2015). Corals above 13 cm<sup>2</sup> have escaped the most severe post-  
256 settlement bottlenecks (Doropoulos et al. 2016) and are subject to group- and size-specific rates of partial  
257 and whole-colony mortality (Appendix S1, Appendix S2: Table S1).



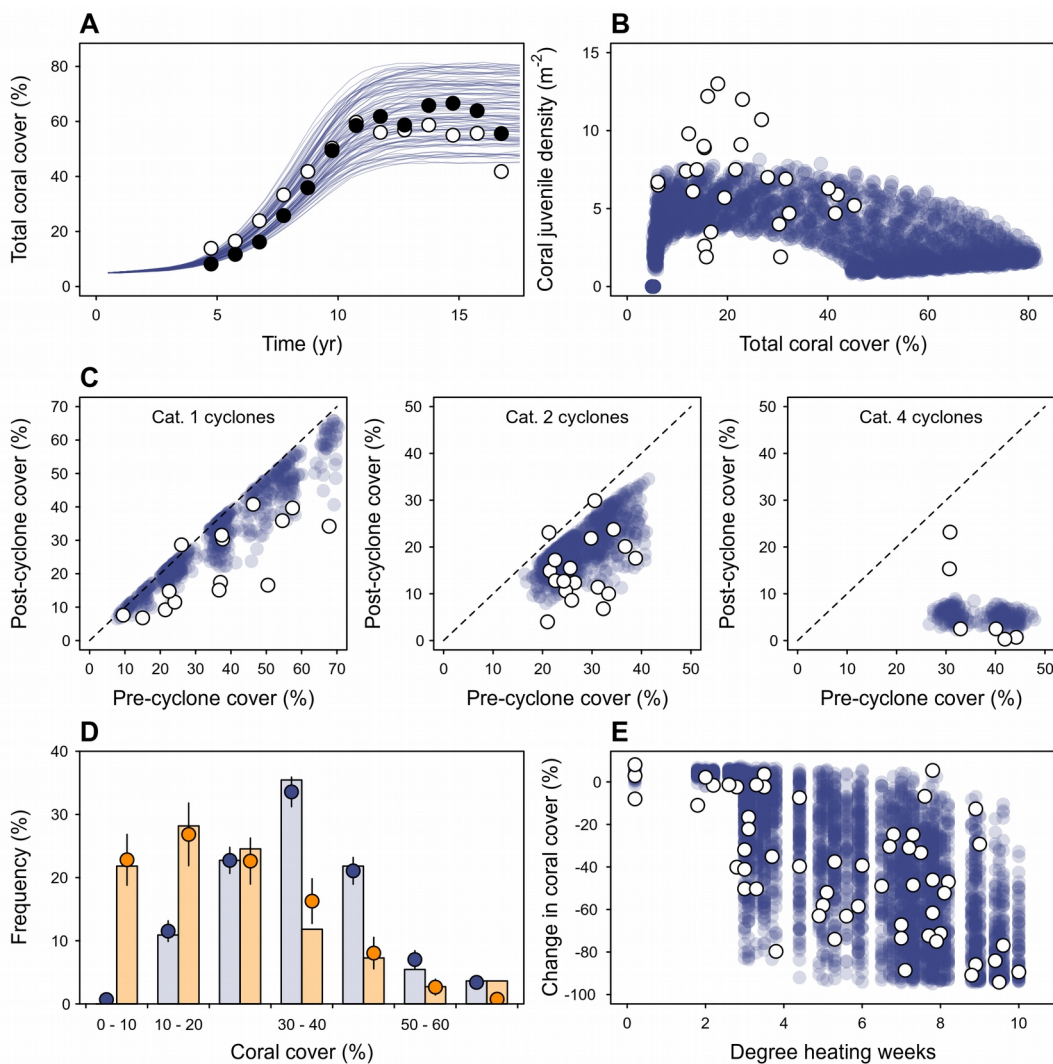

258

259 **Fig. 2.** Calibration of ReefMod-GBR. (A) Mean coral recovery trajectories (overlaid lines) for hypothetical reefs  
 260 ( $n = 40$ ) after calibration of coral recruitment parameters with observed recovery on the outer-shelf of the northern  
 261 (black dots) and southern (white dots) GBR (Emslie et al. 2008). (B) Resulting density of coral juveniles along the  
 262 recovery trajectories compared with observations (Traçon et al. 2013) on the mid-shelf GBR (white dots). Juveniles  
 263 defined here as corals  $< 5$  cm excluding 6-mo old recruits ( $\sim 1$  cm) for comparison. (C) Calibration of storm  
 264 damages on AIMS LTMP sites (white dots: observations; blue dots: simulations,  $n = 40$  stochastic runs) for the  
 265 expected storm intensities (category 1, 2 and 4). Dotted lines indicate equality between pre- and post-disturbance  
 266 coral cover (i.e., no change). (D) Frequency distributions of coral cover on 63 individual reefs before and after  
 267 bleaching as measured (Hughes et al. 2018) across the GBR (blue and orange bars, respectively) and as simulated  
 268 (blue and orange dots, respectively,  $n = 40$  stochastic runs) after calibration of long-term bleaching mortality. (E)  
 269 Corresponding changes in coral cover in response to heat stress (degree heating weeks, DHW) as observed (white  
 270 dots, Hughes et al. 2018) and simulated (blue dots,  $n = 40$  stochastic runs of the 63 reefs). A minimum 3 DHW  
 271 was assumed for bleaching mortality to occur.

## 272 *Effects of suspended sediments on early coral demographics*

273 River run-off expose coral reefs to loads of sediments that are transient in space and time (Schaffelke  
 274 et al. 2012, Waterhouse et al. 2017). These dynamics were captured from retrospective (2010–18) spatial  
 275 predictions of suspended sediments using the eReefs coupled hydrodynamic-biogeochemical model

276 (Herzfeld et al. 2016, Baird et al. 2017). eReefs simulates the vertical mixing and horizontal transport of  
277 fine sediments across the entire GBR, including sediments entering the system through river catchments  
278 (Margvelashvili et al. 2018). We used the 4 km resolution model (GBR4) with the most recent catchment  
279 forcing (model configuration GBR4\_H2p0\_B3p1\_Cq3b). Daily predictions of suspended sediment  
280 concentrations (*SSC*) were obtained by summing variables describing the transport and re-suspension of  
281 small-sized particles: *Mud* (mineral and carbonate, representative size 30  $\mu\text{m}$  with a sinking rate of 17 m/  
282 d), which represent re-suspending particles from the deposited sediments, and *FineSed* (30  $\mu\text{m}$ , sinking  
283 rate 17 m/d) and *Dust* (1  $\mu\text{m}$ , sinking rate 1 m/d), which come from river catchments.

284 Suspended sediments influence many aspects of coral biology (Jones et al. 2015) but are only  
285 considered here at the early-life stages of broadcast spawning corals. Using published experimental data  
286 (Humanes et al. 2017a, 2017b), we modeled dose-response curves between *SSC* (mg/L) and the success  
287 rate of various early-life processes of corals: gamete fertilization, embryo development and subsequent  
288 larval settlement, recruit survival and juvenile growth (Appendix S3: Figs. S1A-C). Experiments and  
289 fitting procedures are detailed in Appendix S1.

290 Spawning corals release combined egg-sperm bundles that immediately ascend to the surface where  
291 fertilization and embryo development take place (Richmond 1997, Jones et al. 2015). To capture sediment  
292 exposure at these early (< 36 h) developmental stages, we extracted near-surface (-0.5 m) eReefs  
293 predictions of *SSC* at the assumed dates of mass coral spawning of six reproductive seasons (2011–2016).  
294 For each 4 km pixel, *SSC* was averaged over three days following field-established dates of *Acropora* spp.  
295 spawning (Hock et al. 2019) in the northern, central and southern GBR, then averaged among consecutive  
296 (split) spawning events (Appendix S3: Fig. S2). The resulting *SSC* values were assigned to the nearest  
297 reef polygon and used to predict, for each spawning season, the success of coral fertilization (Appendix  
298 S1: Eq. S10) and embryo development (manifested as subsequent larval settlement, Appendix S1: Eq.  
299 S11) which we combined to obtain an overall rate of reproduction success (Appendix S3: Figs. S1D, S3).  
300 The resulting rate can be multiplied by the number of coral offspring released before dispersal to simulate  
301 sediment-driven reductions in coral reproduction.

302 Daily predictions of *SSC* at 6-m depth from 2010 to 2018 (Appendix S3: Fig. S4) were used to predict  
303 the survivorship of *Acropora* recruits (Appendix S1: Eq. S12) and the growth potential of all juveniles  
304 (Appendix S1: Eq. S13). Recruit survivorship was expanded to a 6-month period by multiplying the daily  
305 survival rates over each summer (Appendix S3: Figs. S1E, S5). Juvenile growth potential was predicted  
306 from the *SSC* values averaged over each season (Appendix S3: Fig. S1F, S6, S7).

### 307 *Impacts of cyclones on corals*

308 Cyclone-generated waves cause coral dislodgement and fragmentation. While the wave power needed  
309 to dislodge colonies of various sizes and shapes has been estimated (Madin et al. 2014), a measure of  
310 wave power at the scale of individual colonies is often unavailable. Indeed, work is underway to estimate  
311 coral loss from the duration of local exposure to cyclone-generated sea states capable of damaging reefs,  
312 as this can more readily be reconstructed than wave power. In the meantime, we approximated storm-  
313 induced colony mortality as a function of colony size and storm intensity defined on the Saffir-Simpson  
314 scale (1–5) (Mumby et al. 2007, Edwards et al. 2011). Briefly, the probability of whole-colony mortality  
315 for the most severe storm (category 5) is assumed to be a quadratic function of colony size (Massel and

316 Done 1993, Appendix S1): small colonies avoid dislodgement due to their low drag, intermediate-sized  
317 corals have greater drag and are light enough to be dislodged, whereas large colonies are heavy enough to  
318 prevent dislodgement. A Gaussian-distributed noise  $\varepsilon \sim N(\mu = 0, \sigma = 0.1)$  adds variability to mortality  
319 predictions. For storm categories 1–4, these predictions are lowered by 95%, 88%, 75% and 43%,  
320 respectively (Edwards et al. 2011, Appendix S1). Coral colonies larger than 250 cm<sup>2</sup> suffer partial  
321 mortality (i.e., fragmentation): the proportional area lost by a colony follows a normal distribution  
322  $N(\mu = 0.3, \sigma = 0.2)$  for a category 5 storm (Mumby et al. 2007), while the aforementioned adjustments are  
323 applied for other storm category impacts. Finally, scouring by sand during a cyclone causes 80% colony  
324 mortality in recruit and juvenile corals (Mumby 1999).

325 Because the above parameterization was initially derived for Caribbean reefs (Mumby et al. 2007,  
326 2014, Edwards et al. 2011, Bozec et al. 2015), cyclone-driven mortalities were calibrated with GBR  
327 observations of storm damages using the benthic survey database of the Australian Institute of Marine  
328 Science (AIMS) Long-Term Monitoring Program (LTMP). We extracted coral cover data on reefs  
329 surveyed within one year of storm damages and estimated for each reef the expected cyclone intensity  
330 using the Database of Past Tropical Cyclone Tracks of the Australian Bureau of Meteorology (BoM) (see  
331 details in Appendix S1). The magnitude of partial- and whole-colony mortality was tuned until a  
332 reasonable match between the simulated and observed coral cover changes was found for the expected  
333 cyclone categories (Fig. 2C).

### 334 *Mass coral bleaching*

335 Widespread coral bleaching is assumed to be driven by thermal stress (Berkelmans 2002, Hughes et al.  
336 2017, 2018). We used the Degree Heating Week (DHW) as a metric of the accumulated heat stress to  
337 predict bleaching-induced coral mortality (Eakin et al. 2010, Heron et al. 2016). In an extensive survey of  
338 shallow (2 m depth) corals across the GBR during the 2016 marine heatwave, Hughes et al. (2018)  
339 recorded initial coral mortality (i.e., at the peak of the bleaching event) on reefs exposed to satellite-  
340 derived DHW (Liu et al. 2017). A simple linear regression model ( $R^2 = 0.49$ ,  $n = 61$ ) can be fit to the  
341 observed per capita rate of initial mortality,  $M_{BleachInit}$  (%), as a function of local thermal stress (Appendix  
342 S3: Fig. S8):

$$343 \quad M_{BleachInit} = \exp(0.17 + 0.35 \cdot DHW) - 1 \quad (3)$$

344  $M_{BleachInit}$  was used as the incidence rate for both partial and whole-colony mortality caused by  
345 bleaching, assuming they are correlated in their response to thermal stress. The resulting mortality  
346 incidences were further adjusted to each coral group (Appendix S2: Table S1) following reported species  
347 susceptibilities (Hughes et al. 2018). For a coral affected by partial mortality due to bleaching, the extent  
348 of tissue lost (Baird and Marshall 2002) was set to 40% of the colony area for small massive/submassive  
349 (observations on *Platygyra daedalea*), 20% for large massive corals (*Porites lobota*), and a minimal 5%  
350 for the three acroporid groups (*A. hyacinthus* and *A. millepora*) extended to pocilloporids due to  
351 morphological similarities.

352 Because Eq. 3 only captured initial mortality of the 2016 GBR heatwave, coral response over an entire  
353 bleaching event (i.e., including post-bleaching mortality) was determined by calibration with coral cover  
354 changes reported in the following 8 months (Hughes et al. 2018). We initialized hypothetical reefs with  
355 the observed pre-bleaching values of coral cover (Fig. 2D) and simulated heat stress using the DHW

356 values recorded in 2016 (Appendix S1). The overall magnitude of the resulting bleaching mortalities (i.e.,  
357  $M_{BleachInit}$ ) was progressively increased until the predicted coral cover changes matched the observations  
358 (Fig. 2D, E).

### 359 *Crown-of-thorns starfish outbreak dynamics*

360 Outbreak dynamics of the crown-of-thorns starfish (*Acanthaster* spp, CoTS) were simulated using a  
361 simple cohort model where starfish density is structured in 6-month age classes. The model integrates  
362 nutrient-limited larval survivorship and age-specific mortality which are key for predicting outbreak  
363 dynamics (Birkeland and Lucas 1990, Pratchett et al. 2014).

364 Because the survival of pelagic-feeding CoTS larvae is strongly dependent on phytoplankton  
365 availability (Okaji 1996, Wolfe et al. 2017), high nutrients following terrestrial run-off, especially after  
366 intense river flood events, may have the potential to trigger population outbreaks (Brodie et al. 2005,  
367 Fabricius et al. 2010). A daily survival rate ( $SURV$ ) of CoTS larvae can be estimated from the  
368 concentration of chlorophyll  $a$  (Chl  $a$ ,  $\mu\text{g/L}$ ), a proxy of phytoplankton abundance (Fabricius et al. 2010,  
369 Appendix S3: Fig. S9):

$$370 \quad SURV = \left[ \frac{1}{1 + \left( \frac{1.07}{\text{Chl } a} \right)^{2.91}} \right]^{1/22} \quad (4)$$

371 We extracted subsurface (0–3 m) daily concentrations of total chlorophyll  $a$  predicted by eReefs  
372 during eight consecutive spawning seasons (Dec. 2010–Feb. 2018, Appendix S3: Fig. S10). For each  
373 4 km pixel, the average daily survival (geometric mean) over a spawning season was extended to 22 days  
374 (duration of the developmental period, Fabricius et al. 2010) and assigned to the nearest reef polygon  
375 (Fig. 3A, Appendix S3: Fig. S11). Nutrient-enhanced larval survivorship on a reef was simulated by  
376 multiplying the predicted survival to the number of offspring released before dispersal.

377 After dispersal, larval supply to a given reef was converted into a number of settlers (Eq. 1) with  
378 parameters determined by calibration (detailed below). The fate of newly settled CoTS was determined by  
379 age-specific rates of mortality sourced from the literature (Appendix S2: Table S2). To derive this  
380 mortality function, we first estimated daily mortality rates from the reported surviving fraction of CoTS  
381 individuals and the period of observations. A log-log linear model ( $R^2 = 0.80$ ,  $n = 8$ ) was then fitted to the  
382 resulting mortality-at-age estimates (Fig. 3B):

$$383 \quad M = 91.23 \cdot A^{-0.57} \quad (5)$$

384 where  $M$  represents the monthly mortality rate (%) of CoTS at age  $A$  (month). In simulations,  
385 mortality-at-age was converted to a 6-month equivalent ( $1 - (1 - M / 100)^6$ ) and applied to the  
386 corresponding age class at every step. The same mortality function was used for all reefs in the absence of  
387 reliable data on predation on CoTS. Maximum CoTS age was set to 8 years (Pratchett et al. 2014) with  
388 100% of individuals older than that dying due to senescence.

389 The amount of coral surface consumed by CoTS over a 6-month period was determined from  
390 published rates of consumption per individual size (starfish diameter) during summer and winter (Keesing  
391 and Lucas 1992) after representative size-at-age conversions (Engelhardt et al. 1999). As a result, CoTS

392 substantially feed on corals from the age of 18 mo+ (~150–200 mm diameter). The amount of coral  
 393 surface consumed for each coral group was determined using empirically-derived feeding preferences  
 394 (De'ath and Moran 1998). While relative feeding proportions reflect a strong preference for the three  
 395 *Acropora* groups (~75% of CoTS consumption), these are further adjusted to the proportion of each coral  
 396 group currently available on a reef.

397 The density of coral-eating CoTS (18 mo+) collapses due to starvation when the cover of all  
 398 acroporids and pocilloporids drops below 5%. Although this allows reproducing the observed rapid  
 399 decline of outbreaking CoTS when coral is depleted (Moran 1986), mass mortalities in high-density  
 400 populations of *Acanthaster* can also be triggered by disease (Zann et al. 1987, 1990, Pratchett 1999)  
 401 before significant coral damage occurs (Pratchett 2010). To capture this density-dependent process, an  
 402 outbreaking CoTS population will collapse after a random time period drawn from a uniform distribution  
 403 of 2–5 years, which is the duration of most observed outbreaks (Moran 1986, Pratchett et al. 2014). A  
 404 CoTS population is considered outbreaking when the density of 18 mo+ starfish reaches 0.6  
 405 individuals/400 m<sup>2</sup> (Moran and De'ath 1992).

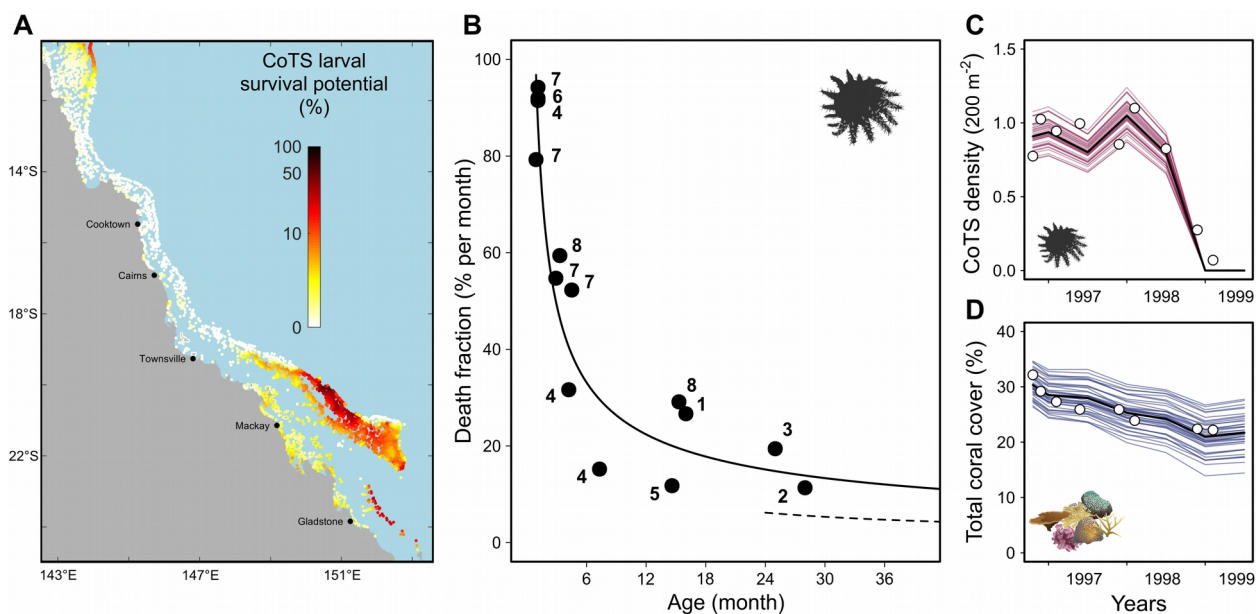

406  
 407 **Fig. 3.** (A) Percent survival rate of CoTS larvae before dispersal derived from subsurface (0–3 m) daily predictions  
 408 (eReefs-GBR4) of Chl a during the spawning season (Dec.–Feb.) averaged over the period 2010–2018. (B) Point  
 409 estimates of CoTS mortality (monthly % death fraction) as a function of individual age derived from manipulative  
 410 experiments and cohort surveys (Appendix S1: Table S2) with the fitted log-log linear model  
 411 ( $\log_e y = 4.51 - 0.57 \cdot \log_e x$ ) equivalent to Eq. 5. Age was estimated as the median age of the cohort during the  
 412 study period. Temporal changes in CoTS densities (C) and coral cover (D) as observed at Lizard Island (white dots,  
 413 Pratchett 2005, 2010) and as simulated (colored lines: replicate trajectories; black lines: average trajectories) after  
 414 calibration of mortality of 2 yr+ starfish (dotted line in B), coral consumption and recruitment parameter  $\beta$ .  
 415 Temporal changes in starfish size distribution (Fig. S12) were also included in the calibration.

416 CoTS outbreak dynamics and associated impacts on corals were calibrated using observations from  
 417 Lizard Island, northern GBR (Pratchett 2005, 2010). Starfish populations were initialized with the  
 418 density-at-size recorded in Oct-Dec 1996 after appropriate size-age conversion (Engelhardt et al. 1999).

419 Because the first observed starfish size class (diameter < 15 cm) is likely underestimated by visual  
420 surveys (MacNeil et al. 2016), its density was deduced from the 15–20 cm class following mortality at the  
421 corresponding age. Recruit (0–6 month old starfish) density was set to zero as expected in winter. Here,  
422 CoTS populations were forced to collapse after 2 years as observed (Pratchett 1999, 2005). Simulations  
423 reproduced the observed changes in CoTS density (Fig. 3C) and size distribution (Appendix S3: Fig. S12)  
424 after lowering the mortality of 2 y+ (> 20 cm) starfish (Fig. 3B). Maximum settlement rate ( $\alpha$ ) was fixed  
425 to 100 settlers/m<sup>2</sup>, which, with the above adjustment of adult mortality, gives an adult population size of  
426 ~64 adults (> 25 cm) per 400 m<sup>2</sup> reef area, similar to the maximum adult densities observed on the GBR  
427 (Engelhardt et al. 1999, 2001). The steepness of the B-H relationship ( $\beta$ ) was set to 12,500 larva/m<sup>2</sup>.  
428 Starting with the Oct-Dec 1996 average coral cover ( $\mu = 30.7\%$ ,  $\sigma = 0.2 \times \mu$ , half being acroporids,  
429 Pratchett 2010), reproduction of the observed coral cover changes (Fig. 3D) required a near-doubling  
430 ( $\times 1.8$ ) of the published feeding rates.

#### 431 *Unconsolidated coral rubble*

432 Coral mortality following acute stress generates loose coral debris that cover the reef substratum and  
433 inhibit coral recruitment (Fox et al. 2003, Biggs 2013). As a first approximation, we assume that the  
434 percent coral cover lost after disturbance converts into percent rubble cover, although collapsed coral  
435 branches might cover a larger area than their standing counterparts. Structural collapse occurs  
436 immediately after cyclones but is delayed for three years after bleaching and CoTS predation (Sano et al.  
437 1987). Coral juveniles do not survive on unconsolidated rubble (Fox et al. 2003, Viehman et al. 2018),  
438 which amounts to reducing their survivorship by the proportion of the reef area covered by rubble. Loose  
439 coral rubble tend to stabilize over time with processes of carbonate binding and cementation (Rasser and  
440 Riegl 2002). These dynamics were approximated using an exponential decay function (Appendix S3:  
441 Fig. S13) assuming that ~2/3 of coral rubble is consolidated after 4 years (Biggs 2013).

#### 442 *Macroalgae and grazing*

443 The modeling of grazing and algal dynamics is detailed elsewhere (Bozec et al. 2019) so is only  
444 briefly described here. The model simulates algal dynamics by 1-month iterations using empirical rates of  
445 macroalgal recruitment and growth. Each grid cell can be occupied by four algal groups: (1) closely  
446 cropped algal turf (< 5mm), (2) uncropped algal turf (> 5mm), (3) encrusting fleshy macroalgae and (4)  
447 upright macroalgae. Cropped algal turf is the default substrate maintained by repeated grazing onto which  
448 corals can settle and grow. When a cell is left ungrazed for 1 month, diminutive algal turf becomes  
449 uncropped and the two macroalgal groups grow following a logistic curve (Bozec et al. 2019). Due to  
450 limited spatial data on fish and algae, macroalgae and turf were assumed to be maintained in a cropped  
451 state suitable for coral settlement. Realistic spatial predictions of grazing levels is yet to be developed for  
452 the GBR and will require extensive data on the size structure and species composition of herbivorous fish  
453 across a range of habitats (Mumby 2006, Fox and Bellwood 2007).

#### 454 **Reconstruction of recent (2008–2020) reef trajectories of the GBR**

455 Model simulations were run with spatially- and temporally- realistic regimes of water quality (SSC  
456 and Chl *a*), storms and thermal stress to reconstruct the trajectory of coral cover of the 3,806 reefs  
457 between 2008–2020 (end of winter 2007 to end of winter 2020).

458 Initial coral cover on each reef was generated at random from a normal distribution  $N(\mu, \sigma = 0.2 \times \mu)$   
459 with mean value  $\mu$  derived from AIMS monitoring surveys (Sweatman et al. 2008, Thompson et al. 2019)  
460 performed on 204 reefs between 2006–2008 (Appendix S1). Reefs that were not surveyed during this  
461 period were initialized with the mean coral cover of the corresponding latitudinal sector (11 sectors,  
462 Sweatman et al. 2008) and shelf position (inshore, mid-shelf and outer shelf). Initial cover was generated  
463 for each coral group separately following the average community composition of each sector and shelf  
464 position. Random covers of loose coral rubble and sand were generated with a mean of 10% and 30%,  
465 respectively.

466 The 2010–2018 regime of water quality (i.e., suspended sediments and Chl *a*) predicted by eReefs was  
467 imposed as a recursive sequence over the 2008–2020 period. The same sequence was applied to the  
468 selection of connectivity matrices to preserve spatial congruence between larval dispersal and the  
469 hydrodynamic forcing of water quality. Past exposure to cyclones was derived from sea-state predictions  
470 of wave height (Puotinen et al. 2016). The potential for coral-damaging sea state (wave height > 4 m) was  
471 determined using a map of wind speed every hour within 4 km pixels over the GBR for cyclones between  
472 2008–2020. Any reef containing a combination of wind speed and duration capable of generating 4 m  
473 waves, assuming sufficient fetch, was scored as positive for potential coral-damaging sea-state in the  
474 respective year. Where damaging waves were predicted, an estimate of cyclone category was deduced  
475 from the distance to the cyclone track extracted from the BoM historical database. To simulate past  
476 exposure to thermal stress, we extracted from the NOAA Coral Reef Watch (CRW) Product Suite version  
477 3.1 (Liu et al. 2017) the 2008–2020 annual maximum DHW available at 5-km resolution, consistent with  
478 the DHW-mortality relationship of the 2016 bleaching (Eq. 3, Hughes et al. 2018). Reefs were assigned  
479 the maximum DHW value of the nearest 5-km pixel.

480 Exposure to *Acanthaster* outbreaks was hindcast by combining starfish demographic simulations with  
481 observed abundance from monitoring ( $n = 289$  reefs with at least one survey between 2008–2020)  
482 conducted by the AIMS LTMP (Sweatman et al. 2008) and the Great Barrier Reef Marine Park Authority  
483 (GBRMPA) Reef Joint Field Management Program (GBRMPA 2019). Initial CoTS densities were  
484 predicted by hindcast (1985–2008) simulations of the Coral Community Network (CoCoNet) model  
485 (Condie et al. 2018). This predator-prey model simulated age-structured CoTS populations with fast- and  
486 slow-growing coral cover dynamics across ~3,000 reefs using a representative regime of storms and  
487 bleaching ( $n = 50$  stochastic runs). Mean densities of adult CoTS (as mean counts per hypothetical manta  
488 tow) predicted in 2008 were assigned to the 3,806 reefs and treated as rate parameter values of a Poisson  
489 distribution in order to initialize ReefMod with random CoTS densities. At the following steps, CoTS  
490 populations on reefs that were not surveyed in the respective year were predicted by population dynamics,  
491 whereas reefs surveyed that year were imposed the corresponding observation of adult count. Assuming  
492 0.22 CoTS per tow represents 1,500 CoTS/km<sup>2</sup> (Moran and De'ath 1992), input count values were  
493 transformed into an equivalent starfish density per reef area and dis-aggregated by age following age-  
494 specific predictions of starfish mortality. Density-at-age was further corrected for imperfect detectability  
495 using empirical predictions from MacNeil et al. (2016).

496 To evaluate model performance, predictions of total coral cover over time were compared to observed  
497 time-series from AIMS monitoring (transects and standardized manta tows, Appendix S1). We selected  
498  $n = 67$  individual reefs monitored at least 12 times between 2009–2020 (i.e., excluding 2008 surveys used

499 for model initialization) and calculated for each survey the difference between the observed total coral  
500 cover and the mean prediction ( $n = 40$  simulations) for the corresponding season. The resulting deviations  
501 were averaged over each time-series to assess prediction errors in the different sections of the GBR.

## 502 **Assessment of cumulative impacts and resilience during 2008–2020**

503 To investigate temporal coral changes across the GBR, we quantified year-on-year absolute changes  
504 ( $AC$ ) in percent coral cover for each reef:

$$505 \quad AC = \%C_{fin} - \%C_{ini} \quad (6)$$

506 where  $\%C_{ini}$  and  $\%C_{fin}$  are the percentage total coral cover at the beginning and at the end of a one-year  
507 period, respectively. Because the magnitude of coral cover change is likely dependent on the initial value  
508 of coral cover (Côté et al. 2005, Graham et al. 2011), we also calculated for every reef and every year the  
509 relative rate of coral cover change ( $RC$ ) as follows:

$$510 \quad RC = \frac{100 \times (\%C_{fin} - \%C_{ini})}{\%C_{ini}} \quad (7)$$

511 Within one time-step of ReefMod simulation (i.e., 6 months), stress-induced coral mortality (i.e., due  
512 to CoTS, cyclones, and bleaching) is applied after the processing of coral recruitment, growth and natural  
513 mortality. To quantify the individual impact of each of these stressors, their associated loss of total coral  
514 cover was tracked annually and expressed both as absolute (% cover/y) and relative (i.e., proportional to  
515 coral cover *before* disturbance, %/y). The latter metric allowed calculation of standardized annual rates of  
516 coral mortality ( $m_{r,s}$ ) on every reef  $r$  due to each stressor  $s$  (i.e., CoTS, cyclones and bleaching), a  
517 necessary step for assessing the relative importance of the three acute stressors across the entire GBR.

518 To assess the potential of coral recovery, the absolute change in total coral cover over 6 months was  
519 extracted for each reef *before* stress-induced coral mortality, thus providing an estimate of total coral  
520 cover growth in the absence of disturbances. Spatial and temporal variations of these rates of coral  
521 community growth ( $g$ , in % cover per 6 month) were analyzed with generalized linear models (GLM).  
522 Simulated data of the first two time-steps were excluded to reduce the influence of model initialization.  
523 Using GLMs as tools of variance partitioning for simulated data sets (White et al. 2014), we estimated the  
524 variance components of  $g$  per reef ( $n = 3,806$ )  $\times$  time-step ( $n = 24$ )  $\times$  run ( $n = 40$ ) explained by eight  
525 environmental variables: total coral cover before growth; cover of sand patches; cover of loose coral  
526 rubble; water quality-driven percentage success of (i) coral reproduction, (ii) recruit survival of  
527 acroporids and (iii) juvenile growth; relative proportion of external vs internal (self) larval supply in the  
528 connectivity matrices, where external supply is the sum of the connection strengths from source reefs;  
529 number of connections from source reefs. The cover of coral rubble was time-averaged for each reef  $\times$  run  
530 because its fluctuations and associated effects on coral juveniles are unlikely to impact coral cover over 6-  
531 month. For the same reason, the reef-specific values of water quality and connectivity variables were  
532 averaged over time. Residuals were modeled with a gamma distribution with a log link function. Because  
533  $g$  can be negative (i.e., when natural mortality exceeds recruitment and colony growth) with a minimal  
534 value of  $-1.5\%$  cover per 6 month, it was fitted as  $g + 2$  to obtain a strictly positive response variable.

535 The GLM predictions of  $g$  for a given reef environment can be used to simulate a stepwise process of  
536 coral cover growth using a simple recursive equation:



537 
$$\%C_{r,t} = \%C_{r,t-1} + g(\%C_{r,t-1}, P_{x,r,t-1}) \quad (8)$$

538 where the incremental growth of total coral cover ( $g$ ) on reef  $r$  at step  $t$  is predicted from the previous-  
539 step value of coral cover ( $\%C_{r,t-1}$ ) and the other environmental predictors ( $P_{x,r,t-1}$ ). To assess the influence  
540 of water quality on coral recovery on inshore reefs, we simulated coral growth curves from an initial  
541 5% cover using Eq. 8 and the percentage success of early-life coral demographics calculated from  
542 representative steady-state (i.e., time-averaged)  $SSC$  values. The other predictors (sand, coral rubble and  
543 connectivity drivers) were set to their median value. Finally, to visualize the recovery potential across the  
544 entire GBR, we mapped the standardized annual growth rate of every reef obtained by simulating Eq. 8  
545 over two time-steps (i.e., yearly), from a hypothetical 10% coral cover and with the reef-specific values of  
546 water-quality and connectivity predictors.

547 Assessing the cumulative impacts of multiple stressors requires integrating both their acute and  
548 chronic effects on coral mortality and growth. This was performed by simulating coral cover in every reef  
549 as a dynamic balance between cover growth  $g$  and the combined rates of annual mortality  $m_{r,s}$  due to  
550 CoTS, cyclones and bleaching:

551 
$$\%C_{r,t} = \left[ \%C_{r,t-1} + g(\%C_{r,t-1}, P_{x,r,t-1}) \right] \cdot \prod_s (1 - m_{r,s}) \quad (9)$$

552 With this formulation, coral cover on a given reef has a single stable equilibrium (i.e., independent of  
553 initial cover) which is fully determined by the adverse effects of growth and stress-induced mortality. This  
554 equilibrium state approximates the value of coral cover that would be obtained when averaged over a long  
555 period of time, provided that the regimes of recovery and disturbance remain unchanged.

556 The equilibrium cover of each reef was determined based on the associated forcing of water quality,  
557 larval connectivity, cyclones, bleaching and CoTS. Although the 2010–2018 fluctuations of  $SSC$  can be  
558 considered as a near-typical regime of water quality, episodic storms and marine heatwaves experienced  
559 between 2008–2020 may not adequately represent average exposures. We thus gathered additional data to  
560 extend the cyclone and bleaching regimes and calculate more reliable annual mortalities. For cyclones,  
561 we used simulated regimes of region-scale occurrence of storm categories that combine GBR historical  
562 statistics (1970–2011) with synthetic cyclone tracks (Wolff et al. 2018). For bleaching, we extended the  
563 NOAA time series of annual maximum DHW back to 1998 to capture earlier (i.e., 1998, 2002) mass  
564 bleaching on the GBR (Berkelmans et al. 2004, Hughes et al. 2017). From these historical rates of  
565 disturbances, we generated 100 stochastic scenarios of storm and bleaching events over 20 years for every  
566 reef and inferred the associated mortality (relative coral cover loss) from regression models derived from  
567 the 2008-2020 reconstruction (Appendix S3: Fig. S14). The predicted coral losses were averaged across  
568 all scenarios to generate mean annual mortalities for each reef. For CoTS, we used the mean annual  
569 mortalities of the 2008-2020 reconstruction. Eq. 9 was simulated until a near-equilibrium cover was  
570 achieved for each reef, and the resulting equilibrium states used as a metric quantifying the ecosystem  
571 potential of reefs under their cumulative stress regime of cyclones, bleaching, CoTS and water quality.  
572 This metric is a critical asset for the evaluation of engineering resilience (Holling 1996) and allows  
573 setting reference values against which ecosystem performance can be measured (Mumby and Anthony  
574 2015, Lam et al. 2020).

## 575 RESULTS

### 576 Reconstructed 2008–2020 reef trajectories

577 Hindcast simulations of 3,806 reefs (Fig. 4A) indicated an overall decline of corals during the period  
578 2008–2020 with a global mean coral cover that dropped from ~29% to ~19% (annual absolute cover loss  
579  $-0.74$  % cover/y over 13 years). This is equivalent to a 33% relative loss of the initial cover. There was  
580 considerable variation among the three regions in the annual rate of coral cover change (Table 1) due to  
581 geographic differences in the timing and magnitude of coral mortality events and recovery periods.  
582 Overall, corals in the northern, central and southern regions declined by  $-15.2$ ,  $-2.9$  and  $-8.6$  % cover,  
583 respectively. This corresponds to a relative loss of the initial cover of 54%, 13% and 26% in each  
584 respective region. Cross-shelf variability in reef trajectories was important (Appendix S3: Fig. S15) with  
585 the strongest relative losses obtained for the inner-shelf (63-73%), the northern mid-shelf (58%) and  
586 southern outer-shelf (44%) regions (Appendix S2: Table S3).

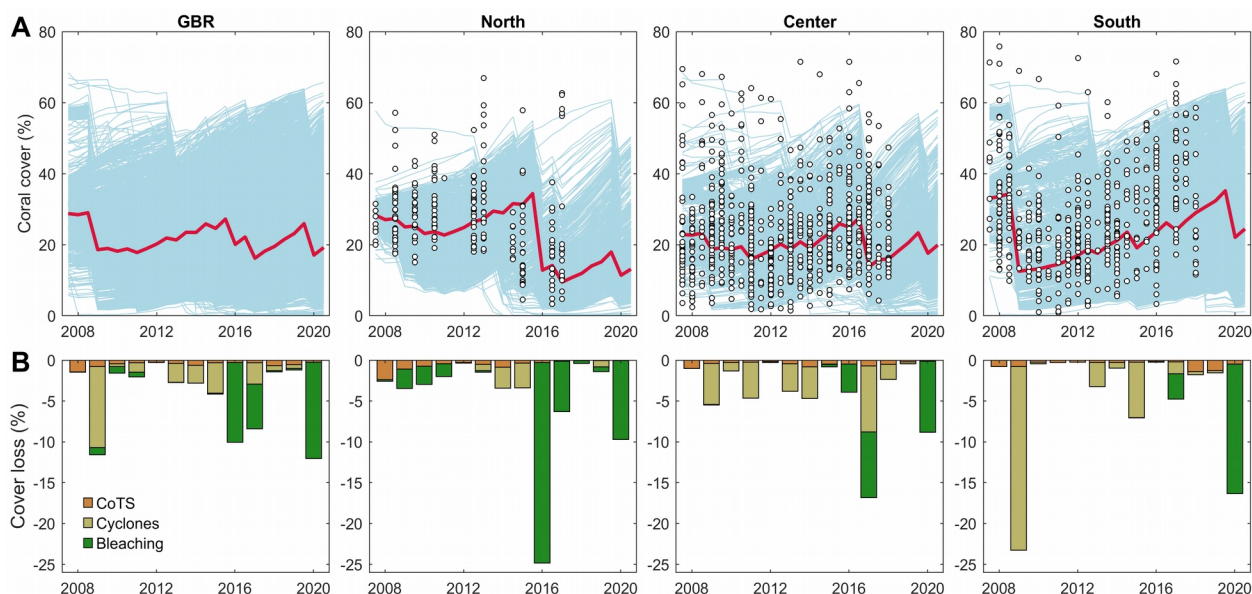

587

588 **Fig. 4. (A)** Hindcast (2008–2020) reconstruction of coral cover trajectories (blue lines: individual reef trajectories  
589 averaged over 40 simulations; red line: regional average weighted by the log-transformed area of reef polygons) for  
590 the whole GBR ( $n = 3,806$  reefs) and the northern ( $n = 1,201$  reefs), central ( $n = 957$  reefs) and southern ( $n = 1,648$   
591 reefs) regions. Data points indicate observations of coral coverage from AIMS monitoring (transect and transformed  
592 manta tow estimates, Appendix S1). **(B)** Mean annual absolute loss of coral cover due to CoTS, storm damages and  
593 heat stress during 2008–2020.

594 At the reef level, the reconstructed coral trajectories generally matched field observations from  
595 monitoring data (Fig. 5) including the magnitude of observed coral declines following acute disturbances  
596 and the post-disturbance timing of coral recovery. Among the 67 monitored reefs selected to validate  
597 model predictions (Appendix S3: Fig. S16), 75% exhibited a mean deviation (predicted – observed  
598 averaged over the time series) between  $-8.1$  and  $+5.8$  % coral cover. The most frequent model errors were  
599 due to inaccuracies in the predicted occurrence (false positives and negatives) or intensity of storm  
600 damages.

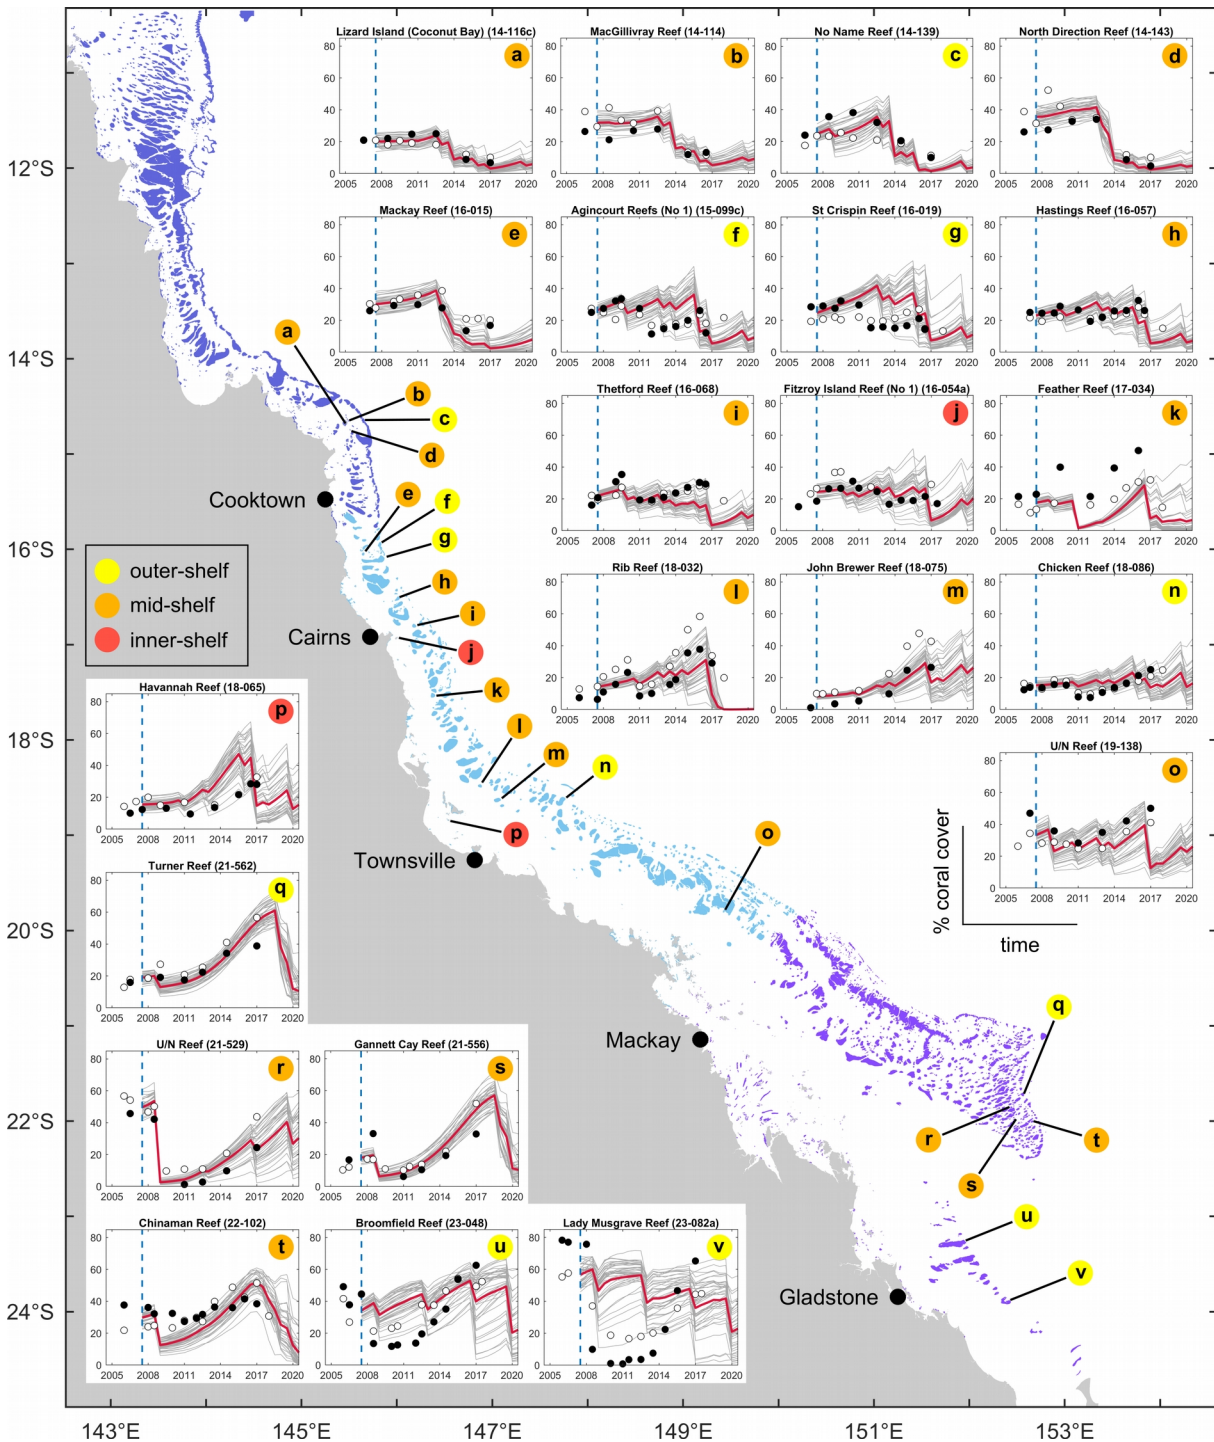

601

602 **Fig. 5.** Validation of the reconstructed trajectories of coral cover with field observations from the AIMS LTMP  
 603 (filled circles: point-intercept transects; open circles: standardized manta tows, Appendix S1). The dashed blue line  
 604 indicates model initialization (winter 2007), whereby initial coral cover was determined as the mean cover of  
 605 surveys performed between 2006 and 2008. Reefs selected for validation ( $n = 22$ ) gathered at least 14 surveys  
 606 during 2009–2020 (see Appendix S3: Fig. S16 for a broader selection of surveyed reefs).

## 607 Coral loss due to bleaching, cyclones and CoTS

608 There were considerable variations in the magnitude of coral loss across years and among the three  
 609 regions (Fig. 4B). Averaged over the 2008–2020 period and across the entire GBR (Table 1), bleaching  
 610 was the most important driver of coral loss (–2.5 % cover/y mean annual absolute cover loss) followed by  
 611 cyclones (–1.9 % cover/y), well ahead of CoTS (–0.4 % cover/y). The three stressors resulted in a  
 612 cumulative annual loss of –4.9 % cover/y throughout the GBR, with the northern and central regions  
 613 being the most and least affected, respectively.

614 **Table 1.** Mean annual rates (% cover/y) of absolute coral cover change (*AC*), growth and mortality from  
 615 disturbances (CoTS, cyclones and bleaching) for 2008–2020. Growth represents the net outcome between coral  
 616 cover growth (due to recruitment and colony extension) and natural mortality, in the virtual absence of disturbances  
 617 (formally, before disturbances occur).

|                         | GBR  | North | Central | South |
|-------------------------|------|-------|---------|-------|
| Net annual cover change | –0.7 | –1.2  | –0.2    | –0.7  |
| Annual cover loss       |      |       |         |       |
| due to CoTS             | –0.4 | –0.4  | –0.4    | –0.5  |
| due to cyclones         | –1.9 | –0.6  | –2.3    | –2.9  |
| due to bleaching        | –2.5 | –4.0  | –1.7    | –1.6  |
| total                   | –4.9 | –5.0  | –4.5    | –5.0  |
| Annual growth           | +4.1 | +3.8  | +4.2    | +4.3  |

618 Impacts of bleaching essentially occurred during the last five years, with intense and widespread heat  
 619 stress (Fig. 6A) causing an estimated mean absolute decline of –9.8 % cover in 2016, –5.5 % cover in  
 620 2017 and –11.8 % cover in 2020 throughout the entire GBR (Table 2, Fig. 6B). The 2020 heatwave  
 621 produced the most severe impacts in terms of proportional coral loss (40% mean loss of pre-bleaching  
 622 coral cover, Table 2) and number of impacted reefs (85% of reefs with a proportional loss > 20%; 2016:  
 623 39%; 2017: 45%, Fig. 6C). The Northern GBR was the most severely impacted sector with all three  
 624 bleaching events causing significant coral loss, especially during 2016 (mean absolute loss of –  
 625 24.6 % cover). The central region was also affected by the three heatwaves, experiencing increasing  
 626 levels of coral mortality at each bleaching event. While escaping mass bleaching in 2016, the Southern  
 627 GBR was hit by the two following heatwaves, especially in 2020 (–15.9 % cover). Overall, only 10% of  
 628 the GBR experienced less than 20% proportional loss for all three events of mass bleaching. Spatial  
 629 discrepancies between the footprint of heat stress and absolute cover loss (e.g., in the far north in 2017  
 630 and 2020) were likely caused by prior coral depletion, leading to a decoupling between absolute (Fig. 6B)  
 631 and proportional cover loss (Fig. 6C) in these regions.

632 **Table 2.** Impacts of the three marine heatwaves (2016, 2017 and 2020) as absolute (% cover) and proportional (in  
 633 parenthesis) coral cover loss (ie, relative to pre-bleaching total coral cover) averaged by region. Bleaching impacts  
 634 result from reef-level predictions of heat stress (DHW) and simulated coral community composition.

| Year of mass bleaching | GBR         | North       | Central    | South       |
|------------------------|-------------|-------------|------------|-------------|
| 2016                   | -9.8 (26%)  | -24.6 (63%) | -3.5 (12%) | -0.1 (0%)   |
| 2017                   | -5.5 (24%)  | -6.2 (37%)  | -8.1 (29%) | -3.1 (8%)   |
| 2020                   | -11.8 (40%) | -9.6 (46%)  | -8.7 (33%) | -15.9 (39%) |

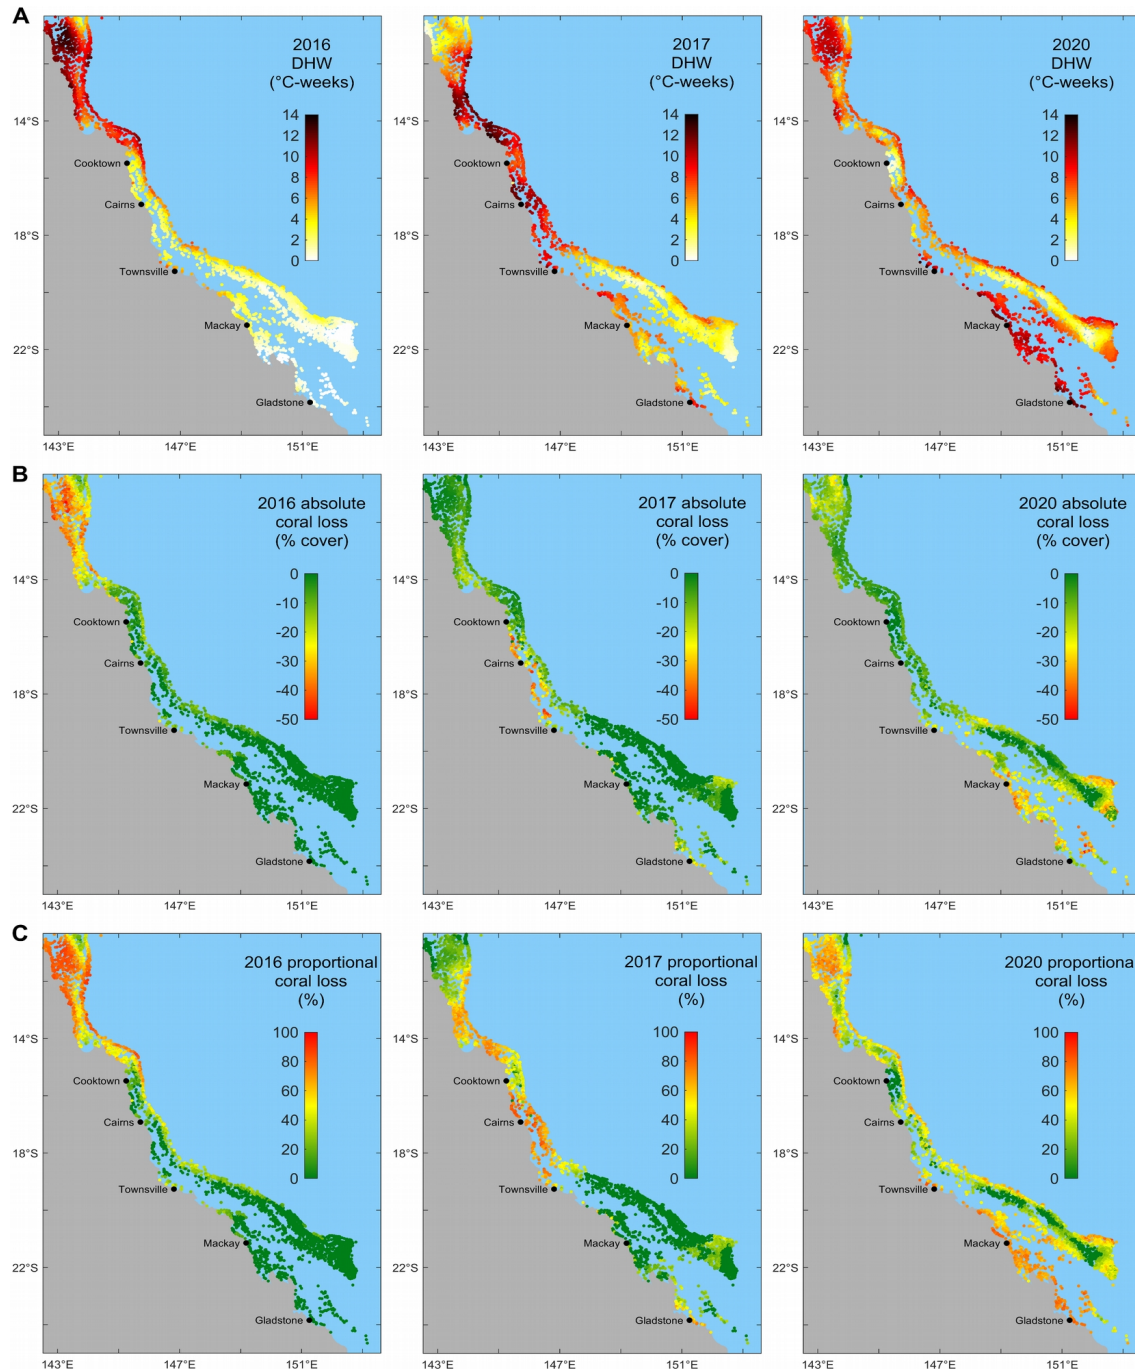

635

636 **Fig. 6.** Marine heatwave (2016, 2017 and 2020) associated predictions of reef-level (A) heat stress (seasonal  
637 maximum DHW), (B) absolute loss of total coral cover and (C) proportional loss (i.e., relative to pre-bleaching total  
638 coral cover) averaged over  $n = 40$  simulations.

639 While cyclones during 2008–2020 had relatively minor impacts across the Northern GBR, they were  
640 an important driver of coral loss in the central and southern regions (Fig. 4B, Table 1). In particular,  
641 cyclone Hamish in 2009 caused considerable impacts across the Southern GBR with an average loss of –  
642 22.5 % cover (65% proportional cover loss), making it the most catastrophic disturbance event at a  
643 regional level during 2008–2020 (Appendix S2: Table S4). Other notable storm events included cyclones

644 Yasi in 2011 (Central GBR), Ita in 2014 (Northern/Central GBR), Marcia in 2015 (Southern GBR) and  
 645 Debbie in 2017 (mainly Central GBR). Overall, 26% of the GBR experienced less than 20% proportional  
 646 loss for all individual storm events.

647 Impacts of CoTS outbreaks were of similar magnitude in the three regions in terms of annual absolute  
 648 cover loss (between  $-0.4$  and  $-0.5$  % cover/y, Fig. 4B, Table 1). Because the magnitude of coral loss is  
 649 dependent on initial reef states, the spatial comparison of stressor impacts requires expressing them as  
 650 proportional losses relative to the pre-disturbance coral cover (Figs. 7A-C). Across the GBR, CoTS,  
 651 cyclones and bleaching caused, respectively, a mean 1.8%, 7.1% and 8.5% proportional reduction of total  
 652 coral cover each year (Fig. 7D). Annual proportional cover loss revealed regional differences with greater  
 653 CoTS impacts in the Central GBR (2.4%/y) than in the northern (1.7%/y) and southern (1.7%/y) regions.  
 654 At a reef scale, relative impacts of CoTS outbreaks were extremely patchy with severe coral mortality  
 655 ( $> 15\%/y$ ) occurring globally in the Cairns-Cooktown area ( $15^{\circ}\text{S}$ – $18^{\circ}\text{S}$ ) and at the southern end of the  
 656 GBR (Figs. 7A, D). The distribution of storm impacts (Figs. 7B, D) revealed a region of intense coral  
 657 cover mortality ( $> 15\%/y$ ) between  $19^{\circ}\text{S}$ – $21^{\circ}\text{S}$  due to recurrent storm events (5-6 storms between 2008–  
 658 2020) with some particularly severe (cyclones Hamish in 2009, Marcia in 2015). Bleaching-induced  
 659 mortality increased from South to North and was generally stronger ( $> 15\%/y$ ) on the outer reefs  
 660 (Figs. 7C, D).

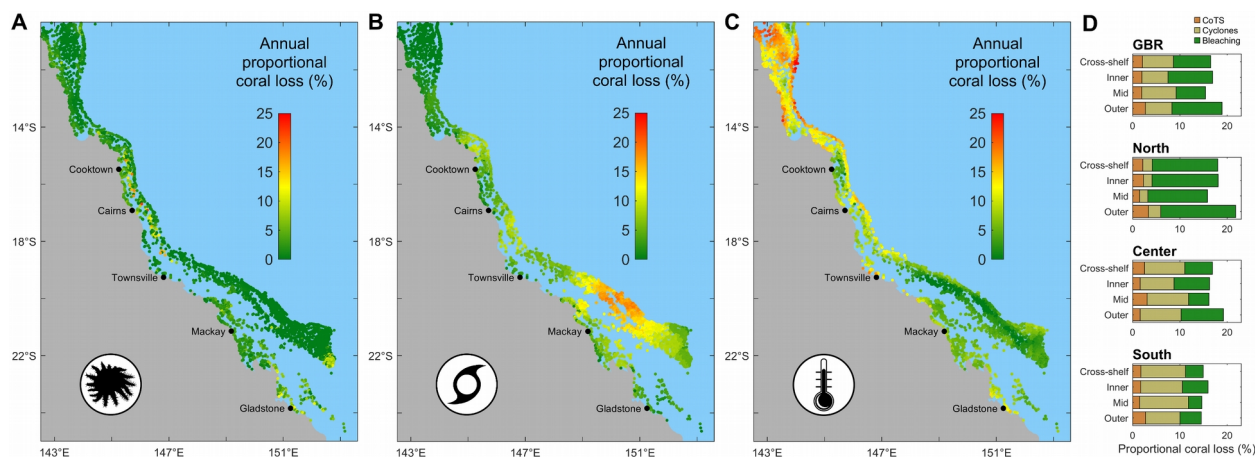

661  
 662 **Fig. 7.** 2008-2020 mean annual proportional loss of coral cover across the GBR caused by (A) CoTS consumption,  
 663 (B) cyclone damages, (C) heat stress. (D) Mean annual relative cover loss per shelf position across the GBR.

## 664 Coral recovery potential

665 Subtracting total annual cover loss from net annual cover change (Table 1) allowed calculating an  
 666 average rate of coral cover growth for each region: ranging from  $+3.8$  to  $+4.3$  % cover/y. Coral  
 667 community growth ( $g$ ) over 6-month, extracted reef by reef before the processing of acute disturbances,  
 668 was analyzed with GLMs fitted separately with every environmental predictor to assess their relative  
 669 contribution on coral recovery (Appendix S2: Table S5). Total coral cover was, by far, the most important  
 670 predictor of subsequent cover growth (25.0% deviance explained when fitted alone), evidenced by a  
 671 quadratic influence on  $g$  (Fig. 8A). Other influential factors were sand cover (3.2% deviance explained)  
 672 and the three water quality-driven demographic potentials (0.5–0.7%). The relative influence of the water

673 quality drivers on coral recovery increased when the GLMs were fitted on inshore reefs only (2.1–3.8%,  
674 vs. 5.7% and 4.2% for coral cover and sand cover, respectively), with the percentage success of coral (i.e.,  
675 *Acropora*) recruitment being the prominent factor. Rubble cover and the two connectivity variables  
676 (proportion of external supply and number of external links) were the least influential factors on coral  
677 recovery. In total, the eight environmental drivers accounted together for 35.6% of the deviance explained  
678 by a global GLM fitted on all reefs.

679 Simulating coral cover growth curves from a recursive equation (Eq. 8) where growth is predicted by  
680 the global GLM revealed the impact of *SSC* on recovery dynamics on inshore reefs (Fig. 8B). From an  
681 initial 5% coral cover, growth predictions led to ~50% coral cover after ~10 years under steady-state  
682 (year-averaged) *SSC* < 0.3 mg/L – a concentration that corresponds to the 10<sup>th</sup> percentile of inshore reefs  
683 ( $n = 1,374$ ). Under steady-state *SSC* > 4.5 mg/L (75<sup>th</sup> percentile), the same level of coral cover (i.e.,  
684 50% cover) would be achieved after a minimum of 15 years, equivalent to a 50% increase in recovery  
685 time. Recovery to 50% coral cover was delayed by ~9 month for every 1 mg/L increment of steady-state  
686 *SSC* (inset, Fig. 8B).

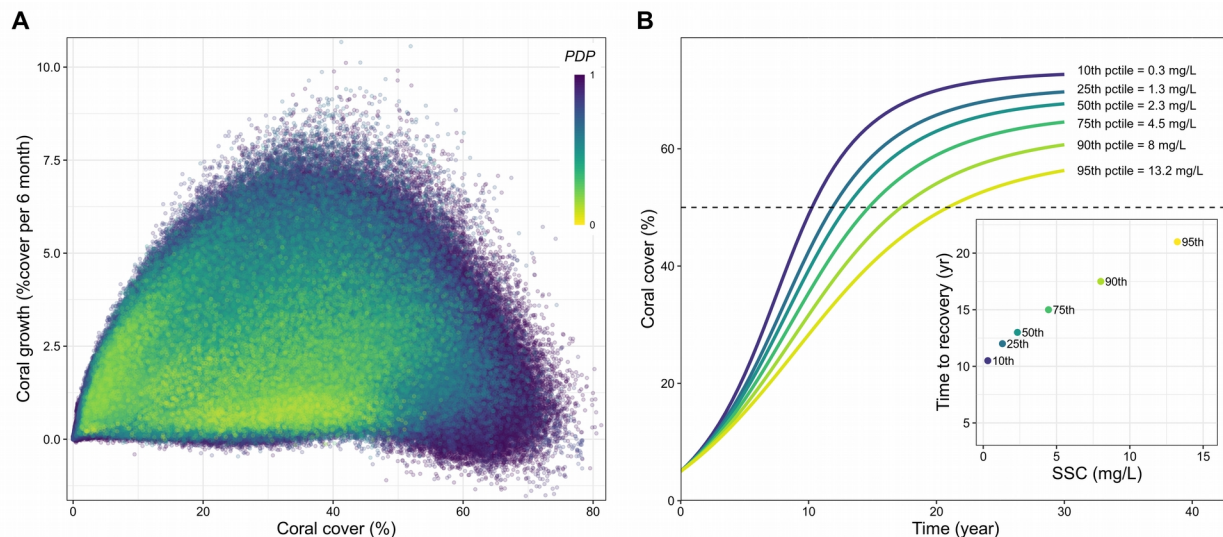

687

688 **Fig. 8.** (A) Quadratic influence of initial total coral cover on subsequent coral cover growth rate ( $g$ ) on all reefs  
689 during 2009–2020 ( $n = 3,653,760$  model realizations). Color code refers to the product *PDP* of the three *SSC*-driven  
690 demographic potentials (reproduction, recruit survival for acroporids and juvenile growth) averaged across all  
691 available years; *PDP* ranges from 0 (no viable demographics) to 1 (full demographic performance). (B) GLM-based  
692 coral recovery curves for hypothetical inshore reef environments exposed to year-round *SSC* (mg/L), obtained by  
693 the recursive prediction of  $g$  (Eq. 8) from an initial coral cover of 5%. The three water-quality drivers were  
694 calculated for representative *SSC* values of inshore reefs (10<sup>th</sup>, 25<sup>th</sup>, 50<sup>th</sup>, 75<sup>th</sup>, 90<sup>th</sup> and 95<sup>th</sup> percentiles out of  
695 1,374 reefs) with the other predictors set to their median value (GBR-wide across all years) – Sand: 30%;  
696 Rubble: 11%;  $\text{Connect}_{\text{num}}$ : 8.5;  $\text{Connect}_{\text{prop}}$ : 0.06. The inset displays recovery times to 50% cover under each *SSC*.

## 697 Cumulative impacts and reef resilience

698 The mapping of the standardized growth rate of total coral cover predicted by the GLM from 10%  
699 coral cover and reef-specific values of the environmental drivers revealed the geographic footprint of  
700 water quality (Fig. 9A). On average, the recovery potential was 14% lower inshore than offshore. On

701 offshore reefs, the slowest growth rates were obtained in the Cairns/Cooktown region (14°S–18°S).

702 The combined rates of annual mortalities due to CoTS, cyclones and bleaching (Fig. 9B), calculated  
703 using longer-term exposures to storms (1970–2011) and heat stress (1998–2020), revealed two regions of  
704 high coral mortality (up to 25%/y): on the mid-shelf reefs of the Cairns/Cooktown region (14°S–18°S)  
705 and on the southern inshore (near Gladstone) and offshore reefs. Reefs with minimal total mortality were  
706 mostly found offshore between 20°S–22°S.

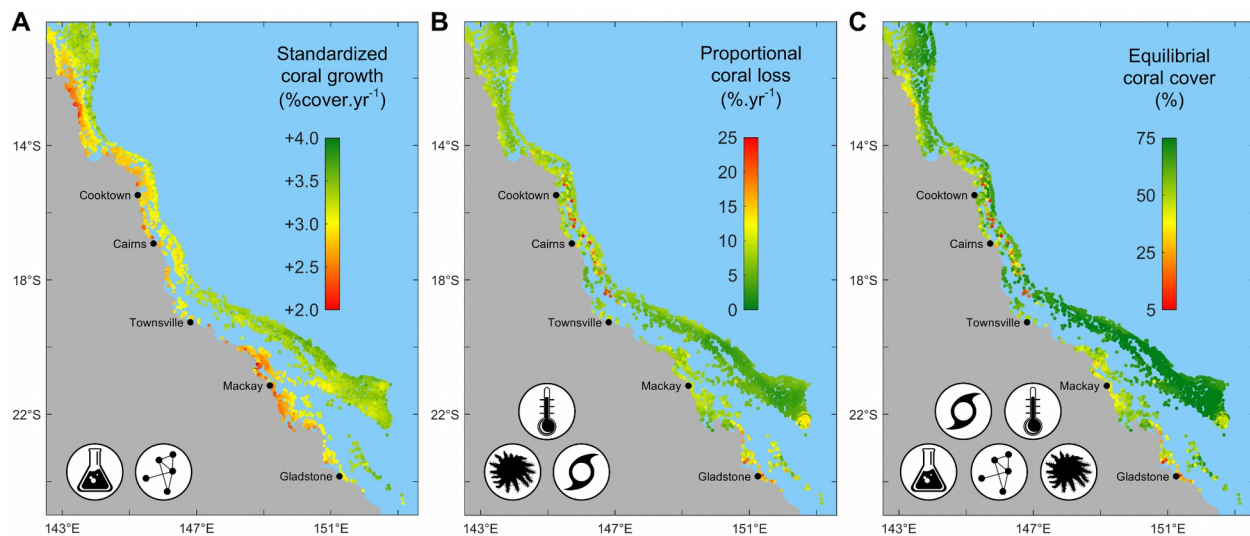

707

708 **Fig. 9.** (A) Annual growth rate of total coral cover based on GLM predictions from a standard 10% coral cover on  
709 all reefs with the reef-specific values of early-life coral demographics (water-quality driven) and larval connectivity.  
710 (B) Long-term average mortality (mean annual proportional loss of total coral cover) due to CoTS, cyclones and  
711 heat stress combined. (C) Equilibril coral cover determined from long-term simulation of growth and average mortality.

712 The cumulative impacts of all stressors were reflected in the computed equilibril covers (Fig. 9C)  
713 which approximate the average value of total coral cover under local regimes of water quality, CoTS,  
714 cyclones and bleaching (Eq. 9). Using a starting cover of 30%, all reefs achieved their deterministic  
715 equilibrium in 100 years (Appendix S3: Fig. S17). The median equilibrium state was 45% coral cover on  
716 inshore reefs and 61% offshore (i.e., mid-and outer-shelf combined), reflecting the impact of water  
717 quality in the modeled coral dynamics.

## 718 DISCUSSION

719 Coral populations on the GBR are distributed over a vast network of disparate reef environments,  
720 making it extremely difficult to assess the relative contribution of multiple stressors in time and space. We  
721 developed a simulation model of coral demographics to quantify the cumulative effects of multiple  
722 disturbances and explain how they drive coral cover at local and regional scales. The model integrates  
723 existing knowledge on the core underlying mechanisms of coral population dynamics with state-of-the-art  
724 spatial data capturing fine-scale environmental forcing across > 3,800 reefs. Our simulation of coral  
725 colony-scale processes under a temporally- and spatially-realistic stress regime provided a credible  
726 reconstruction of recent (2008–2020) trajectories of coral cover. Overall, the model indicated a general



727 decline of coral cover over the past 13 years, with mass coral bleaching and cyclones dominating the  
728 simulated share of total acute stress on the GBR. The model disentangled the individual impacts of acute  
729 stressors as proportional cover losses and quantified rates of coral recovery across the entire reefscape.  
730 Spatial patterns of standardized coral cover growth highlighted the influence of suspended sediments in  
731 creating cross-shelf disparities in the potential of coral recovery. The cumulative impacts of all stressors  
732 on coral cover loss and recovery were captured within a single metric (equilibrium states) quantifying  
733 how much coral cover can be sustained on a reef given its forcing regime. Overall, our study highlights  
734 the value of mechanistic simulations for cumulative impacts assessments and management on coral reefs.

### 735 **GBR hindcast (2008–2020)**

736 The reconstructed coral trajectories indicated a general decline of coral cover from ~29% to ~19%,  
737 equivalent to a loss of one third of corals in 13 years. The corresponding annual rate of absolute cover  
738 loss during 2008–2020 (–0.74% cover/y) is greater than during 1985–2012 (–0.53% cover/y) as  
739 previously calculated from monitoring data collected on 214 reefs (De’ath et al. 2012). Yet, the 1985–  
740 2012 assessment used only AIMS manta-tow estimates of coral cover (De’ath et al. 2012) whereas our  
741 simulations were initialized with transect-equivalent coral cover values (i.e., transect and converted  
742 manta-tow estimates), which are ~7% cover higher on average (Appendix S1). A more recent  
743 reconstruction produced a rate of annual cover loss of –1.92% cover/y between 2009–2016 (Mellin et al.  
744 2019) based on spatially-explicit simulations of coral cover changes derived from AIMS transect-  
745 equivalent cover estimates. This rate of annual cover loss is considerably higher than the one estimated by  
746 our mechanistic simulations, yet it did not include the 2017 and 2020 bleaching events. However, inter-  
747 study comparisons are difficult as rates of absolute coral cover loss are dependent on pre-disturbance  
748 levels of coral cover, and different start- and end-points will capture a different sequence of disturbance  
749 events and recovery periods. Our reconstruction of coral trajectories provides rates of coral loss that are  
750 independent of the fluctuating baseline cover, facilitating cross-studies comparisons of the recent spatio-  
751 temporal coral dynamics on the GBR and providing a means to make future projections.

752 Our simulations also provide an assessment of coral reef health after the 2020 mass bleaching  
753 (Fig. 12A, Appendix S2: Table S6). We found that 22% of reefs are in a critical state (< 10% coral cover),  
754 42% are in a poor state (10–20% coral cover) and only 19% are currently healthy (> 30% coral cover).  
755 Recent manta-tow surveys across the mid- and outer-shelf Central GBR (AIMS 2020) indicate that, by  
756 June 2020, 42% of reefs (out of 33) were in a critical state, whereas only 12% would be considered  
757 healthy using the above benchmarks. Our predictions for this region (excluding inshore reefs) yield a  
758 comparable figure based on 550 reefs after manta-tow adjustment: 39% reefs in a critical state vs. 9%  
759 healthy. Overall, the reconstructed trajectories exhibited a good agreement with the observed time-series  
760 of coral cover, recognizing that local discrepancies between reef-scale predictions and observations will  
761 inevitably arise. Some of these would constitute genuine errors in the model where a process is  
762 represented inappropriately – such as overlooking the contribution of key coral taxa – yet many will also  
763 reflect the substantive difficulty of capturing field forcing conditions in spatial layers. For example, while  
764 a cyclone track can be represented reasonably well, the dissipation of cyclone-induced wave energy  
765 around reef structures and islands is difficult to model accurately (Callaghan et al. 2020, Puotinen et al.  
766 2020) and may fail to represent the conditions experienced by the reef from which coral cover  
767 measurements were taken. Moreover, storm damage is very patchy (Fabricius et al. 2008, Beeden et al.

768 2015), generating variable reef responses (Fig. 2C). Failure to predict what a reef actually experienced  
769 more likely reflects the difficulty of predicting stress exposure rather than an inappropriate demographic  
770 parameterization.

771 Inaccurate spatial predictions can also arise from the necessary simplification of complex coral  
772 assemblages. With coral demographic rates being representative of species typically found on offshore  
773 reef habitats, the model may underestimate coral cover on some inshore (turbid-tolerant) reefs (DeVantier  
774 et al. 2006, Browne et al. 2012). Moreover, efficient herbivore control of macroalgae was assumed despite  
775 evidence of abundant macroalgae on some inshore reefs (De'ath and Fabricius 2010, Thompson et al.  
776 2019, Ceccarelli et al. 2020). How much this simplification affects coral cover predictions will depend on  
777 whether seaweed deter coral colonization or simply overgrow the space left vacant by coral mortality. In  
778 future, with the integration of further processes affecting reefs locally (e.g., nutrient-driven macroalgal  
779 production, realistic grazing), we expect the predictive capacity of ReefMod-GBR will improve.

## 780 **Drivers of coral loss**

781 Measured in terms of absolute coral loss, bleaching was the most important stressor GBR-wide during  
782 2008–2020 (–2.5 % cover/y), accounting for 49% of the stress-induced loss, while CoTS outbreaks only  
783 contributed to 11%. Manta-tow surveys (De'ath et al. 2012) for 1985–2012 found bleaching and CoTS  
784 accounted for, respectively, 10% and 42% of disturbance-driven coral mortality (see also Osborne et al.  
785 2011 for similar figures using AIMS transect surveys between 1995–2009). The relative contribution of  
786 cyclones during 2008–2020 was similar to 1985–2012 (40% vs. 48%, respectively). The importance of  
787 cyclone impacts during both periods was partly driven by the considerable span of damage produced by  
788 Hamish (2009) in the Southern GBR, a severe cyclone with an unusual (coast-parallel) track. With three  
789 extreme heatwaves over 2008–2020 vs. only two over 1985–2012, it is no surprise that bleaching  
790 accounted for a greater share of stress-induced coral mortality in our study. We note, however, that our  
791 simulation of mass bleaching relies on mortalities observed at ~2 m depth (Hughes et al. 2018), so  
792 represent the upper tail of the potential stress at ~5–10 m depths. Indeed, the incidence of bleaching can  
793 decrease substantially with depth due to the attenuation of light stress (Baird et al. 2018).

794 In the last five years, mass coral bleaching has caused successively a proportional loss of 44% (2016–  
795 2017 combined) and 40% (2020) of the pre-bleaching coral cover across the entire GBR. The fact that  
796 only 10% of the GBR escaped significant bleaching-induced mortality (< 20% proportional loss) raises  
797 important concerns about the ability of the GBR to cope with more frequent and intense heat stress under  
798 a warming climate (e.g., Wolff et al. 2018). Our simulations indicated that the southern region had  
799 regained most of its pre-2009 (cyclone Hamish) coral cover by the onset of the 2020 mass bleaching,  
800 despite significant loss caused by cyclone Marcia in 2015. In the northern region, the marine heatwave in  
801 2020 erased three years of recovery (+8.4 % cover) that followed the successive impacts of the 2016–  
802 2017 bleaching events. With a 59% proportional reduction of coral cover from 2008 to 2020, northern  
803 reefs are the main losers of the past decade. Clearly, anthropogenic bleaching has now become a key  
804 driver of coral mortality across the GBR, threatening its ability to recover from other stressors.

805 Impacts of CoTS outbreaks were relatively minor (–0.4 % cover/y) during 2008–2020 compared to  
806 previous assessments (–1.4 % cover/y, De'ath et al. 2012), although this period has coincided with the  
807 onset (in 2010) of the 4th cycle of CoTS outbreak since 1960s (Pratchett et al. 2014). Given that CoTS

817 density has been surveyed for only 2% of the GBR, we relied on the random initialization of CoTS  
818 populations derived from the spatial predictions of the CoCoNet model (Condie et al. 2018) with the  
819 subsequent dynamics driven by larval dispersal and coral abundance. The importance of nutrient-  
820 enhanced larval survival in the initiation of CoTS outbreaks is still debated (Pratchett et al. 2014, 2017,  
821 Wolfe et al. 2017), and it is noteworthy that survival of CoTS larvae predicted by chlorophyll simulations  
822 over eight spawning seasons (2010–2018) was very low in the Cairns–Cooktown area (Fig. 3A, Appendix  
823 S3: Fig. S11), a region where all four CoTS outbreaks appear to have initiated (Brodie et al. 2005,  
824 Pratchett et al. 2014). Comparisons between eReefs predictions and in situ measurements have revealed a  
825 tendency of the model to locally underestimate nutrient and chlorophyll concentrations (Robson et al.  
826 2020). On the other hand, CoTS likely started their gradual build-up several years before the first  
827 detection of outbreaking densities in 2010. While eReefs predictions were only available from December  
828 2010, large river floods in this region during CoTS spawning in 2008 and 2009 had the potential of  
829 developing primary outbreaks (Fabricius et al. 2010).

830 High chlorophyll concentrations were prevalent in the southern section of the GBR (Swains and  
831 Capricorn/Bunker sectors), both on inner and outer reefs (Appendix S3: Fig. S10). Inshore, this is likely  
832 due to runoff events with a culmination during the 2010–2011 wet season (Appendix S3: Fig. S11). This  
833 facilitated the propagation of CoTS populations created at initialization, although there is currently no  
834 evidence of CoTS outbreaks on southern inner reefs (Thompson et al. 2019). On southern offshore reefs,  
835 high Chl a is the result of recurrent intrusions of nutrient-rich waters by upwelling on the shelf break (e.g.,  
836 Andrews and Furnas 1986, Berkelmans et al. 2010), and it has been hypothesized that primary outbreaks  
837 could emerge there with no relation to river-flood events (Moran et al. 1988, Johnson 1992, Miller et al.  
838 2015). Although the causes of primary outbreaks on the GBR are yet to be resolved (Pratchett et al. 2014,  
839 2017), the present model can be used to explore the timing and mechanisms of the propagation of  
840 secondary outbreaks facilitated by nutrient availability (Brodie et al. 2017).

#### 841 **Drivers of coral recovery**

842 The population growth rates that emerged from colony-scale dynamics revealed which environmental  
843 factors contributed most to the expansion of coral cover. First and foremost is the influence of initial coral  
844 cover which determines the subsequent rate of increase in coral cover, corroborating empirical  
845 observations (Graham et al. 2011, Ortiz et al. 2018). With a fixed rate of radial extension, the areal growth  
846 increment is greater for larger colonies than for smaller ones, so that, at least at the initial stage of coral  
847 colonization, the rate of cover growth becomes gradually faster as corals get bigger. As large and  
848 sexually-mature colonies become more prevalent, self-recruitment intensifies because more offspring are  
849 produced, so that population size increases and amplifies the rate of cover growth. Subsequently, coral  
850 colonization reduces the space available for recruitment (Fig. 2B) and colony extension, thereby slowing  
851 down the rate of increase in coral cover until the colonization space is saturated (Fig. 8A). As a result, the  
852 influence of initial coral cover on subsequent growth is non-linear and creates a sigmoid recovery curve  
853 (Fig. 2A) that is typically observed in *Acropora*-dominated communities (Halford et al. 2004, Emslie et  
854 al. 2008). We captured these dynamics at the community scale, first through the statistical modeling of the  
855 stepwise changes of total coral cover, then using the resulting model (GLM) to predict cover growth  
856 increments and reconstruct coral recovery curves. This enabled the integration of influential drivers of  
857 coral growth such as suspended sediments (Fig. 8B) and allowed the systematic exploration of the

858 potential of coral recovery across the entire reefscape (Fig. 9A). This growth model offers an alternative  
859 to heuristic inferences of recovery dynamics based on statistical model fits that depend on data  
860 availability (Thompson and Dolman 2010, Osborne et al. 2011, 2017, Wolff et al. 2018, Mellin et al.  
861 2019).

862 Once standardized with the GLM, spatial variations in coral growth revealed the negative impacts of  
863 suspended sediments on the recovery potential of inshore reefs. This is consistent with recent analyses  
864 (Ortiz et al. 2018, MacNeil et al. 2019) that found reductions in coral cover growth rates with the extent  
865 of river flood plumes assessed by satellite imagery. We note, however, that high *SSC* values can also  
866 result from wind-driven resuspension of fine sediments as observed during the dry season (Appendix S3:  
867 Fig S4B). Our assessment of water quality impacts is based on predictions of transport, sinking and re-  
868 suspension of fine (30  $\mu\text{m}$ ) sediments from hydrodynamic modeling. This enables *SSC* exposure to be  
869 integrated over time periods (days to months) that are relevant to the sensitive stages of coral ontogeny  
870 (Humanes et al. 2017a, 2017b), allowing physiological impacts to be scaled up to the ecosystem level.  
871 Retaining 10 years as a standard recovery time under good water quality conditions (mean annual  
872 *SSC* < 0.3 mg/L, corresponding to 10% of inshore reefs), our simulations indicate that an increment of  
873 1 mg/L of steady-state *SSC* retards coral recovery by 9 month (Fig. 8B). While these predictions can help  
874 setting water quality targets for management, they are likely biased toward a specific response of  
875 acroporids (Appendix S1) and remain to be tested *in situ*. However, detecting these impacts on coral  
876 cover is challenging: this would require extended time series as the deleterious effects of *SSC* might only  
877 become apparent after a long period of uninterrupted recovery. Although being representative of steady-  
878 state *SSC* exposures (annual averages at 4km resolution), our simulated recovery rates are standardized to  
879 a given coral cover and can be used to compare the recovery potential (Fig. 9A) and resilience (Fig. 9C)  
880 among reefs.

881 Although larval connectivity is widely regarded as an important driver of coral recovery, a quantitative  
882 link between larval supply and coral cover dynamics is yet to be established. Here, larval connectivity had  
883 little influence on the reconstructed coral cover growth, but this does not imply that external larval supply  
884 is not demographically important. With the current parameterization of larval retention (i.e., a minimum  
885 28% of larvae produced by a reef is retained), the contribution of external supply to total settlement is  
886 globally low: based on the transition probabilities (i.e., without accounting for the actual number of larvae  
887 produced), external supply represented 6% of larval supply for 50% of the reefs (mean: 15%). Because  
888 coral settlement was modeled as a saturating function of larval supply, self-supply was generally  
889 sufficient for the making of settlement. There is, however, considerable uncertainty in the set value of  
890 larval retention, with likely variations from reef to reef (Black 1993). Moreover, the relative importance  
891 of self-recruitment would likely decrease after severe coral mortality, making external supply a key  
892 process for local recovery. Future work should model larval dispersal at a finer spatial resolution (i.e.,  
893 < 1 km) for a better evaluation of the relative contribution of self vs external supply. This information is  
894 critical to capture the demographic impacts of larval connectivity and support connectivity-based  
895 management interventions.

## 896 **Cumulative impacts on coral loss and recovery**

897 Expressing stress-induced coral mortality as proportional loss was key to assessing the spatial  
898 distribution of the individual and combined impacts of acute disturbances. This yielded vulnerability

899 maps that reflect the frequency and intensity of recent disturbances contextualized within the coral  
900 community composition predicted by the model, while being independent of the levels of coral cover at  
901 the time of disturbances. The spatial predictions of standardized coral growth and stress-induced coral  
902 mortality allowed computation of the equilibrium state for > 3,800 reefs. Equilibrium states can be  
903 viewed as long-term averages around which coral cover fluctuates in a given reef environment. They  
904 integrate the combined effects of chronic (water quality) and acute stress (bleaching, cyclones, and  
905 CoTS), and their use here is to reveal large-scale patterns in the resilience of the ecosystem (Fig. 9C). Yet,  
906 since coral reefs are non-equilibrial systems that frequently experience acute impacts (Done 1992,  
907 Connell 1997), the transient state of reefs can be far higher or lower than their long-term equilibrium.  
908 With this in mind, the notion of equilibrium state differs from the concept of carrying capacity (the  
909 intrinsic limit of a population) as a reef can exhibit episodically higher levels of coral cover until stress-  
910 induced mortality brings the reef closer to its equilibrial cover value.

911 Although equilibria were created by running the model for 100 years, they do not constitute  
912 projections for future reef health; they merely set regional expectations for the relative state of the system  
913 based on recent stress intensities and frequencies. Like for any resilience metric, transient stress regimes  
914 clearly challenge these expectations (i.e., intensifying heat stress), and projecting equilibrium states  
915 would require integrating specific forecast scenarios of disturbances into their calculation. Moreover, the  
916 present metric of resilience does not account for competitive interactions (e.g., with macroalgae or soft  
917 corals) which will favor emergence of multiple equilibrium states (McManus and Polsenberg 2004,  
918 Mumby et al. 2007). Future model versions will spatially integrate grazing and macroalgal productivity to  
919 assess ecological resilience (*sensu* Holling 1996: the ability to move towards alternate community types)  
920 and define ecological thresholds of coral persistence (Mumby et al. 2007, 2014, Bozec et al. 2016) across  
921 the GBR.

## 922 **Mechanistic approach to cumulative effects assessment**

923 Cumulative impacts on coral reefs have been traditionally assessed through the analysis of monitored  
924 coral cover changes attributed to specific stressors. Yet, disentangling the individual effects of multiple  
925 drivers requires extensive monitoring data due to inherent difficulties in attributing causality to observed  
926 coral changes (Fabricius and De'ath 2004). Moreover, impacts that manifest as a slowing down of coral  
927 growth are easily overlooked by monitoring. While these can be evidenced at the scale of individual  
928 colonies in controlled environments, experimental designs can only manipulate a small number of  
929 stressors and have a limited ability to infer responses at the community level (Hodgson and Halpern  
930 2019). We show that mechanistic simulations that integrate key demographic processes provide important  
931 insights to cumulative effects assessments. Here, the core mechanisms underlying coral demography were  
932 simulated at the scale of coral colonies to quantify stressor impacts on specific biological processes and  
933 developmental life stages. This enabled the emergence of complex interactions and feedbacks that  
934 compound the cumulative effects of multiple drivers and determine the dynamics of coral cover. Whilst  
935 incomplete knowledge on key demographic parameters has inhibited individual-based approaches for  
936 cumulative impacts assessments, we address this issue by providing a suite of empirical relationships  
937 between common stressors and coral demographics to promote a mechanistic evaluation of coral reef  
938 health.

939 To meet the challenge of understanding the behavior emerging from colony-scale simulations, we used

940 statistical approaches that disentangled the contribution of different drivers to coral cover changes. Note  
941 that this does not imply perfect mechanistic knowledge overall; what holds is that given our current  
942 knowledge on how these mechanisms operate individually, we can aim to understand how they interact in  
943 driving coral cover virtually. Testing these predictions empirically will be difficult at any scale, yet the  
944 grounding in underlying mechanisms combined with the successful validation of model behavior provides  
945 a basis for making future predictions outside of the input model parameter space.

## 946 **Implications for reef monitoring and resilience-based management**

947 Managing for coral resilience requires evaluating the current state of reefs, their exposure to  
948 disturbances and their ability to recover from those pressures. Our simulations predict the current state of  
949 > 3,800 reefs on the GBR based on mechanistic expectations and spatio-temporal data on drivers. They  
950 provide an assessment in space and time of the stress regime of each reef covering both chronic  
951 environmental forcing (water quality and larval connectivity) and acute mortality events. This portfolio of  
952 reef vulnerability across the GBR can be combined with present-day spatial predictions of coral cover  
953 (Fig. 10A), community composition and demographic structure, and potential for coral recovery  
954 (incorporating exposure to CoTS and loose coral rubble) to complement reef monitoring. This is  
955 especially important considering that existing monitoring only represents ~40% only of the environmental  
956 regimes of the GBR (Mellin et al. 2020). While the present model informs about recent trends and status  
957 of unmonitored reef areas (~96% of the 3,806 reefs between 2008–2020), it can also help designing more  
958 representative and efficient coral and CoTS surveillance programs in support of reef management.

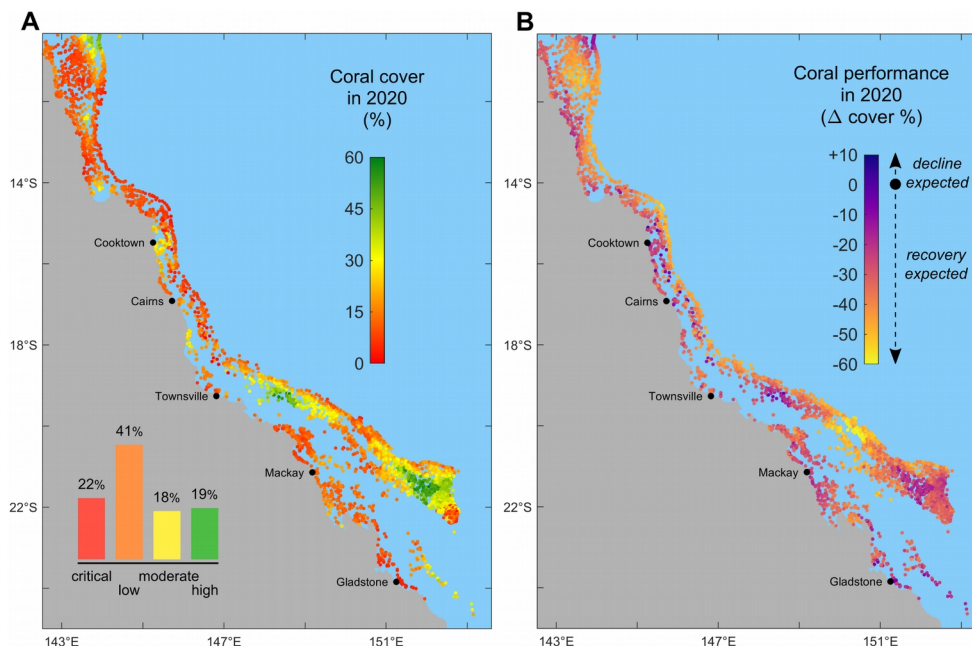

959

960 **Fig. 10.** (A) Present-day (2020) model predictions of total coral cover. Inset: GBR-wide distribution of reef health  
961 status: critical (<10% coral cover); low (10–20%); moderate (20–30%); high (>30%). (B) coral performance in 2020  
962 as the difference between total coral cover and simulated equilibril coral cover. A positive performance value  
963 indicates that present-day coral cover on a reef is greater than expected under its regime of disturbance and  
964 recovery; a decline is expected in a near future. Inversely, under-performing reefs (i.e., negative performance values)  
965 are expected to recover closer or beyond their equilibrium.

966 Of particular significance for an improved management of the GBR is the equilibrium cover as a metric  
967 of reef resilience. While recognizing the limits of predicting coral cover for non-equilibrial systems,  
968 equilibrium states set expectations of future changes in the short term: a coral cover value higher than the  
969 reef's equilibrium state indicates that the reef is performing better than expected, a performance that is  
970 unlikely to persist. Inversely, a reef that is largely under-performing relative to its equilibrium state is  
971 expected to recover beyond the equilibrium value. Comparing the current and potential performance of  
972 reefs (Fig. 10B) may help identify those most likely to respond to interventions and sustain improvements  
973 over the longer term.

974 With ReefMod-GBR, we provide a simulation tool to evaluate management scenarios and help  
975 developing a structured decision-making process. Multiple scenarios of stress mitigation and/or  
976 restoration can be simulated and their performance compared in time and space using an array of model  
977 variables (e.g., coral cover, mortality and recovery rates, CoTS density). To this aim, the equilibrium cover  
978 is an operational metric that can capture changes in cumulative impacts in response to a given  
979 intervention. Equilibrial cover pertains to the associated regime of disturbance, so that a relaxation of  
980 acute (e.g., CoTS control) and chronic stress (e.g., water quality improvement) would lead to a different  
981 equilibrium. Expanding the model with projections of carbon emissions will provide opportunities for  
982 exploring management strategies under climate change, and for prioritizing tactical interventions with the  
983 greatest benefits to the resilience of the GBR.

## 984 ACKNOWLEDGMENTS

985 This research was funded by the Australian Research Council (ARC) Centre of Excellence for Coral Reef  
986 Studies, the Great Barrier Reef Foundation (GBRF), an ARC Discovery Project, the Australian Government's  
987 National Environmental Science Programme (NESP 4.5 and 3.1.1), the Reef Restoration and Adaptation  
988 Project (RRAP) case, and a government consortium (Department of Environment, GBRMPA and the  
989 Queensland Government) to PJM, Y-MB and KH. The current field used for connectivity calculations and the  
990 sediment and chlorophyll fields were developed in the *eReefs* Project, a public-private collaboration between  
991 Australia's leading operational and scientific research agencies, government, and corporate Australia. We thank  
992 C. Doropoulos, G. Roff, N. Wolff, K.R.N. Anthony and B. Schaffelke for fruitful discussions.

## 993 REFERENCES

- 994 Andrews, J. C., and M. J. Furnas. 1986. Subsurface intrusions of Coral Sea water into the central Great Barrier  
995 Reef-I. Structures and shelf-scale dynamics. *Continental Shelf Research* 6:491–514.
- 996 AIMS (Australian Institute of Marine Science). 2020. Annual Summary Report on coral reef condition for 2019/20.  
997 Long-term Reef Monitoring Program. Australian Institute of Marine Science.
- 998 Babcock, R. C., G. D. Bull, P. L. Harrison, A. J. Heyward, J. K. Oliver, C. C. Wallace, and B. L. Willis. 1986.  
999 Synchronous spawnings of 105 scleractinian coral species on the Great Barrier Reef. *Marine Biology* 90:379–  
1000 394.
- 1001 Babcock, R. C., and C. N. Mundy. 1992. Reproductive biology, spawning and field fertilization rates of *Acanthaster*  
1002 *planci*. *Marine and Freshwater Research* 43:525–533.
- 1003 Baird, A. H., and P. Marshall. 2002. Mortality, growth and reproduction in scleractinian corals following bleaching  
1004 on the Great Barrier Reef. *Marine Ecology Progress Series* 237:133–141.
- 1005 Baird, A. H., J. S. Madin, M. Álvarez-Noriega, L. Fontoura, J. T. Kerry, C.-Y. Kuo, K. Precoda, D. Torres-Pulliza, R.  
1006 M. Woods, K. J. Zawada, and others. 2018. A decline in bleaching suggests that depth can provide a refuge from  
1007 global warming in most coral taxa. *Marine Ecology Progress Series* 603:257–264.
- 1008 Baird, M. E., M. P. Adams, J. Andrewartha, N. Cherukuru, M. Gustafsson, S. Hadley, M. Herzfeld, E. Jones, N.

- 1009 Margvelashvili, M. Mongin, and others. 2017. CSIRO environmental modelling suite: scientific description of  
1010 the optical, carbon chemistry and biogeochemical models (BGC1p0). [https://research.csiro.au/ereefs/wp-](https://research.csiro.au/ereefs/wp-content/uploads/sites/34/2015/08/eReefsOpticalBGCframeBGC1p0.pdf)  
1011 [content/uploads/sites/34/2015/08/eReefsOpticalBGCframeBGC1p0.pdf](https://research.csiro.au/ereefs/wp-content/uploads/sites/34/2015/08/eReefsOpticalBGCframeBGC1p0.pdf).
- 1012 Ban, S. S., N. A. Graham, and S. R. Connolly. 2014. Evidence for multiple stressor interactions and effects on coral  
1013 reefs. *Global Change Biology* 20:681–697.
- 1014 Baria, M. V. B., R. D. Villanueva, and J. R. Guest. 2012. Spawning of three-year-old *Acropora Millepora* corals  
1015 reared from larvae in northwestern Philippines. *Bulletin of Marine Science* 88:61–62.
- 1016 Beeden, R., J. Maynard, M. Puotinen, P. Marshall, J. Dryden, J. Goldberg, and G. Williams. 2015. Impacts and  
1017 recovery from severe tropical Cyclone Yasi on the Great Barrier Reef. *PLoS ONE* 10:e0121272.
- 1018 Berkelmans, R. 2002. Time-integrated thermal bleaching thresholds of reefs and their variation on the Great Barrier  
1019 Reef. *Marine Ecology Progress Series* 229:73–82.
- 1020 Berkelmans, R., G. De'ath, S. Kininmonth, and W. J. Skirving. 2004. A comparison of the 1998 and 2002 coral  
1021 bleaching events on the Great Barrier Reef: spatial correlation, patterns, and predictions. *Coral Reefs* 23:74–83.
- 1022 Berkelmans, R., S. J. Weeks, and C. R. Steinberga. 2010. Upwelling linked to warm summers and bleaching on the  
1023 Great Barrier Reef. *Limnology and Oceanography* 55:2634–2644.
- 1024 Biggs, B. C. 2013. Harnessing natural recovery processes to improve restoration outcomes: an experimental  
1025 assessment of sponge-mediated coral reef restoration. *PLoS ONE* 8:e64945.
- 1026 Birkeland, C., and J. Lucas. 1990. *Acanthaster planci*: major management problem of coral reefs. CRC press.
- 1027 Black, K. P. 1993. The relative importance of local retention and inter-reef dispersal of neutrally buoyant material on  
1028 coral reefs. *Coral Reefs* 12:43–53.
- 1029 Bozec, Y.-M., and P. J. Mumby. 2015. Synergistic impacts of global warming on the resilience of coral reefs.  
1030 *Philosophical Transactions of the Royal Society B* 370:20130267.
- 1031 Bozec, Y.-M., L. Alvarez-Filip, and P. J. Mumby. 2015. The dynamics of architectural complexity on coral reefs  
1032 under climate change. *Global Change Biology* 21:223–235.
- 1033 Bozec, Y.-M., S. O'Farrell, J. H. Bruggemann, B. E. Luckhurst, and P. J. Mumby. 2016. Tradeoffs between fisheries  
1034 harvest and the resilience of coral reefs. *Proceedings of the National Academy of Sciences* 113:4536–4541.
- 1035 Bozec, Y.-M., and P. J. Mumby. 2019. Detailed description of ReefMod-GBR and simulation results. Pages 72–113  
1036 Reef Restoration and Adaptation Program: Modelling Methods and Findings. A report provided to the Australian  
1037 Government. Townsville, Australia.
- 1038 Bozec, Y.-M., C. Doropoulos, G. Roff, and P. J. Mumby. 2019. Transient grazing and the dynamics of an  
1039 unanticipated coral–algal phase shift. *Ecosystems* 22:296–311.
- 1040 Bozec, Y. M., and P. J. Mumby. 2020. Coral reef models as assessment and reporting tools for the Reef 2050  
1041 Integrated Monitoring and Reporting Program—a review. Great Barrier Reef Marine Park Authority.
- 1042 Brodie, J., K. Fabricius, G. De'ath, and K. Okaji. 2005. Are increased nutrient inputs responsible for more outbreaks  
1043 of crown-of-thorns starfish? An appraisal of the evidence. *Marine Pollution Bulletin* 51:266–278.
- 1044 Brodie, J., and J. Waterhouse. 2012. A critical review of environmental management of the 'not so Great' Barrier  
1045 Reef. *Estuarine, Coastal and Shelf Science* 104:1–22.
- 1046 Brodie, J., M. Devlin, and S. Lewis. 2017. Potential enhanced survivorship of crown of thorns starfish larvae due to  
1047 near-annual nutrient enrichment during secondary outbreaks on the central mid-shelf of the Great Barrier Reef,  
1048 Australia. *Diversity* 9:17.
- 1049 Browne, N. K., S. G. Smithers, and C. T. Perry. 2012. Coral reefs of the turbid inner-shelf of the Great Barrier Reef,  
1050 Australia: an environmental and geomorphic perspective on their occurrence, composition and growth. *Earth-*  
1051 *Science Reviews* 115:1–20.
- 1052 Callaghan, D. P., P. J. Mumby, and M. S. Mason. 2020. Near-reef and nearshore tropical cyclone wave climate in the  
1053 Great Barrier Reef with and without reef structure. *Coastal Engineering* 157:103652.
- 1054 Ceccarelli, D. M., R. D. Evans, M. Logan, P. Mantel, M. Puotinen, C. Petus, G. R. Russ, and D. H. Williamson.  
1055 2020. Long-term dynamics and drivers of coral and macroalgal cover on inshore reefs of the Great Barrier Reef  
1056 Marine Park. *Ecological Applications* 30:e02008.
- 1057 Cheal, A. J., M. A. MacNeil, M. J. Emslie, and H. Sweatman. 2017. The threat to coral reefs from more intense  
1058 cyclones under climate change. *Global Change Biology* 23:1511–1524.
- 1059 Condie, S. A., É. E. Plagányi, E. B. Morello, K. Hock, and R. Beeden. 2018. Great Barrier Reef recovery through  
1060 multiple interventions. *Conservation Biology* 32:1356–1367.
- 1061 Connell, J. H. 1997. Disturbance and recovery of coral assemblages. *Coral Reefs* 16:S101–S113.



- 1062 Connolly, S. R., and A. H. Baird. 2010. Estimating dispersal potential for marine larvae: dynamic models applied to  
1063 scleractinian corals. *Ecology* 91:3572–3583.
- 1064 Côté, I. M., J. A. Gill, T. A. Gardner, and A. R. Watkinson. 2005. Measuring coral reef decline through meta-  
1065 analyses. *Philosophical Transactions of the Royal Society B: Biological Sciences* 360:385–395.
- 1066 Crain, C. M., K. Kroeker, and B. S. Halpern. 2008. Interactive and cumulative effects of multiple human stressors in  
1067 marine systems. *Ecology Letters* 11:1304–1315.
- 1068 Darling, E. S., and I. M. Côté. 2008. Quantifying the evidence for ecological synergies. *Ecology Letters* 11:1278–  
1069 1286.
- 1070 Darling, E. S., T. R. McClanahan, and I. M. Côté. 2013. Life histories predict coral community disassembly under  
1071 multiple stressors. *Global Change Biology* 19:1930–1940.
- 1072 De’ath, G., and P. J. Moran. 1998. Factors affecting the behaviour of crown-of-thorns starfish (*Acanthaster planci*  
1073 L.) on the Great Barrier Reef: 2: Feeding preferences. *Journal of Experimental Marine Biology and Ecology*  
1074 220:107–126.
- 1075 De’ath, G., and K. Fabricius. 2010. Water quality as a regional driver of coral biodiversity and macroalgae on the  
1076 Great Barrier Reef. *Ecological Applications* 20:840–850.
- 1077 De’ath, G., K. E. Fabricius, H. Sweatman, and M. Puotinen. 2012. The 27-year decline of coral cover on the Great  
1078 Barrier Reef and its causes. *Proceedings of the National Academy of Sciences* 109:17995–17999.
- 1079 DeVantier, L. M., G. De’Ath, E. Turak, T. J. Done, and K. E. Fabricius. 2006. Species richness and community  
1080 structure of reef-building corals on the nearshore Great Barrier Reef. *Coral Reefs* 25:329–340.
- 1081 Done, T. J. 1992. Phase shifts in coral reef communities and their ecological significance. *Hydrobiologia* 247:121–  
1082 132.
- 1083 Done, T. J. 1995. Ecological criteria for evaluating coral reefs and their implications for managers and researchers.  
1084 *Coral Reefs* 14:183–192.
- 1085 Doropoulos, C., S. Ward, G. Roff, M. González-Rivero, and P. J. Mumby. 2015. Linking demographic processes of  
1086 juvenile corals to benthic recovery trajectories in two common reef habitats. *PLoS ONE* 10:e0128535.
- 1087 Doropoulos, C., G. Roff, Y.-M. Bozec, M. Zupan, J. Werninghausen, and P. J. Mumby. 2016. Characterizing the  
1088 ecological trade-offs throughout the early ontogeny of coral recruitment. *Ecological Monographs* 86:20–44.
- 1089 Eakin, C. M., J. A. Morgan, S. F. Heron, T. B. Smith, G. Liu, L. Alvarez-Filip, B. Baca, E. Bartels, C. Bastidas, and  
1090 C. Bouchon. 2010. Caribbean corals in crisis: record thermal stress, bleaching, and mortality in 2005. *PLoS*  
1091 *ONE* 5:e13969.
- 1092 Edmunds, P. J., and B. Riegl. 2020. Urgent need for coral demography in a world where corals are disappearing.  
1093 *Marine Ecology Progress Series* 635:233–242.
- 1094 Edwards, H. J., I. A. Elliott, C. M. Eakin, A. Irikawa, J. S. Madin, M. McField, J. A. Morgan, R. van Woesik, and P.  
1095 J. Mumby. 2011. How much time can herbivore protection buy for coral reefs under realistic regimes of  
1096 hurricanes and coral bleaching? *Global Change Biology* 17:2033–2048.
- 1097 Emslie, M., A. Cheal, H. Sweatman, and S. Delean. 2008. Recovery from disturbance of coral and reef fish  
1098 communities on the Great Barrier Reef, Australia. *Marine Ecology Progress Series* 371:177–190.
- 1099 Engelhardt, U., M. Hartcher, J. Cruise, D. Engelhardt, M. Russell, N. Taylor, G. Thomas, and D. Wiseman. 1999.  
1100 Finescale surveys of crown-of-thorns starfish (*Acanthaster planci*) in the central Great Barrier Reef region. CRC  
1101 Reef Research Centre technical report.
- 1102 Engelhardt, U., M. Hartcher, N. Taylor, J. Cruise, D. Engelhardt, M. Russel, I. Stevens, G. Thomas, D. Williamson,  
1103 and D. Wiseman. 2001. Crown-of-thorns starfish (*Acanthaster planci*) in the central Great Barrier Reef region.  
1104 Results of fine-scale surveys conducted in 1999–2000. Technical Report.
- 1105 Evans, R. D., S. K. Wilson, R. Fisher, N. M. Ryan, R. Babcock, D. Blakeway, T. Bond, P. Dorji, F. Dufois, P. Fearn,  
1106 and others. 2020. Early recovery dynamics of turbid coral reefs after recurring bleaching events. *Journal of*  
1107 *Environmental Management* 268:110666.
- 1108 Fabricius, K. E., and G. De’ath. 2004. Identifying ecological change and its causes: a case study on coral reefs.  
1109 *Ecological Applications* 14:1448–1465.
- 1110 Fabricius, K. E. 2005. Effects of terrestrial runoff on the ecology of corals and coral reefs: review and synthesis.  
1111 *Marine Pollution Bulletin* 50:125–146.
- 1112 Fabricius, K. E., G. De’Ath, M. L. Puotinen, T. Done, T. F. Cooper, and S. C. Burgess. 2008. Disturbance gradients  
1113 on inshore and offshore coral reefs caused by a severe tropical cyclone. *Limnology and Oceanography* 53:690–  
1114 704.

- 1115 Fabricius, K., K. Okaji, and G. De'Ath. 2010. Three lines of evidence to link outbreaks of the crown-of-thorns  
1116 seastar *Acanthaster planci* to the release of larval food limitation. *Coral Reefs* 29:593–605.
- 1117 Filbee-Dexter, K., and T. Wernberg. 2018. Rise of turfs: a new battlefield for globally declining kelp forests.  
1118 *BioScience* 68:64–76.
- 1119 Fox, H. E., J. S. Pet, R. Dahuri, and R. L. Caldwell. 2003. Recovery in rubble fields: long-term impacts of blast  
1120 fishing. *Marine Pollution Bulletin* 46:1024–1031.
- 1121 Fox, R. J., and D. R. Bellwood. 2007. Quantifying herbivory across a coral reef depth gradient. *Marine Ecology*  
1122 *Progress Series* 339:49–59.
- 1123 Graham, N. A. J., K. L. Nash, and J. T. Kool. 2011. Coral reef recovery dynamics in a changing world. *Coral Reefs*  
1124 30:283–294.
- 1125 Graham, N. A., S. Jennings, M. A. MacNeil, D. Mouillot, and S. K. Wilson. 2015. Predicting climate-driven regime  
1126 shifts versus rebound potential in coral reefs. *Nature* 518:94–97.
- 1127 GBRMPA (Great Barrier Reef Marine Park Authority). 2007. Great Barrier Reef (GBR) Features (Reef boundaries,  
1128 QLD Mainland, Islands, Cays, Rocks and Dry Reefs). eAtlas. [https://eatlas.org.au/data/uuid/ac8e8e4f-fc0e-](https://eatlas.org.au/data/uuid/ac8e8e4f-fc0e-4a01-9c3d-f27e4a8fac3c)  
1129 [4a01-9c3d-f27e4a8fac3c](https://eatlas.org.au/data/uuid/ac8e8e4f-fc0e-4a01-9c3d-f27e4a8fac3c).
- 1130 GBRMPA (Great Barrier Reef Marine Park Authority). Great Barrier Reef Outlook Report 2019. GBRMPA,  
1131 Townsville.
- 1132 Haddon, M. 2011. Modelling and quantitative methods in fisheries. CRC Press/Chapman and Hall.
- 1133 Halford, A., A. J. Cheal, D. Ryan, and D. McB. 2004. Resilience to Large-Scale Disturbance in Coral and Fish  
1134 Assemblages on the Great Barrier Reef. *Ecology*:1892–1905.
- 1135 Hall, V., and T. Hughes. 1996. Reproductive strategies of modular organisms: comparative studies of reef-building  
1136 corals. *Ecology* 77:950–963.
- 1137 Halpern, B. S., and R. Fujita. 2013. Assumptions, challenges, and future directions in cumulative impact analysis.  
1138 *Ecosphere* 4:1–11.
- 1139 Harborne, A. R., A. Rogers, Y. M. Bozec, and P. J. Mumby. 2017. Multiple Stressors and the Functioning of Coral  
1140 Reefs. *Annual Review of Marine Science* 9:445–468.
- 1141 Heron, S., L. Johnston, G. Liu, E. Geiger, J. Maynard, J. De La Cour, S. Johnson, R. Okano, D. Benavente, and T.  
1142 Burgess. 2016. Validation of reef-scale thermal stress satellite products for coral bleaching monitoring. *Remote*  
1143 *Sensing* 8:59.
- 1144 Herzfeld, M., J. Andrewartha, M. Baird, R. Brinkman, M. Furnas, P. Gillibrand, M. Hemer, K. Joehnk, E. Jones, D.  
1145 McKinnon, N. Margvelashvili, M. Mongin, P. Oke, F. Rizwi, B. Robson, S. Seaton, J. Skerratt, H. Tonin, and K.  
1146 Wild-Allen. 2016. eReefs Marine Modelling: Final Report. Page 497 pp. CSIRO, Hobart.
- 1147 Hock, K., N. H. Wolff, J. C. Ortiz, S. A. Condie, K. R. Anthony, P. G. Blackwell, and P. J. Mumby. 2017.  
1148 Connectivity and systemic resilience of the Great Barrier Reef. *PLoS Biology* 15:e2003355.
- 1149 Hock, K., C. Doropoulos, R. Gorton, S. A. Condie, and P. J. Mumby. 2019. Split spawning increases robustness of  
1150 coral larval supply and inter-reef connectivity. *Nature Communications* 10:3463.
- 1151 Hodgson, E. E., and B. S. Halpern. 2019. Investigating cumulative effects across ecological scales. *Conservation*  
1152 *Biology* 33:22–32.
- 1153 Hoegh-Guldberg, O., P. J. Mumby, A. J. Hooten, R. S. Steneck, P. Greenfield, E. Gomez, C. D. Harvell, P. F. Sale, A.  
1154 J. Edwards, and K. Caldeira. 2007. Coral reefs under rapid climate change and ocean acidification. *Science*  
1155 318:1737–1742.
- 1156 Holling, C. S. 1996. Engineering Resilience versus Ecological Resilience. *Engineering Within Ecological*  
1157 *Constraints* 31:32.
- 1158 Hughes, T. P., A. H. Baird, D. R. Bellwood, M. Card, S. R. Connolly, C. Folke, R. Grosberg, O. Hoegh-Guldberg, J.  
1159 B. C. Jackson, and J. Kleypas. 2003. Climate change, human impacts, and the resilience of coral reefs. *Science*  
1160 301:929–933.
- 1161 Hughes, T. P., and J. H. Connell. 1999. Multiple stressors on coral reefs: A long-term perspective. *Limnology and*  
1162 *Oceanography* 44:932–940.
- 1163 Hughes, T. P., and J. E. Tanner. 2000. Recruitment failure, life histories, and long-term decline of Caribbean corals.  
1164 *Ecology* 81:2250–2263.
- 1165 Hughes, T. P., D. R. Bellwood, A. H. Baird, J. Brodie, J. F. Bruno, and J. M. Pandolfi. 2011. Shifting base-lines,  
1166 declining coral cover, and the erosion of reef resilience: comment on Sweatman et al.(2011). *Coral Reefs*  
1167 30:653–660.

- 1168 Hughes, T. P., J. T. Kerry, M. Álvarez-Noriega, J. G. Álvarez-Romero, K. D. Anderson, A. H. Baird, R. C. Babcock,  
1169 M. Beger, D. R. Bellwood, R. Berkelmans, and others. 2017. Global warming and recurrent mass bleaching of  
1170 corals. *Nature* 543:373.
- 1171 Hughes, T. P., J. T. Kerry, A. H. Baird, S. R. Connolly, A. Dietzel, C. M. Eakin, S. F. Heron, A. S. Hoey, M. O.  
1172 Hoogenboom, G. Liu, and others. 2018. Global warming transforms coral reef assemblages. *Nature* 556:492.
- 1173 Humanes, A., A. Fink, B. L. Willis, K. E. Fabricius, D. de Beer, and A. P. Negri. 2017a. Effects of suspended  
1174 sediments and nutrient enrichment on juvenile corals. *Marine Pollution Bulletin* 125:166–175.
- 1175 Humanes, A., G. F. Ricardo, B. L. Willis, K. E. Fabricius, and A. P. Negri. 2017b. Cumulative effects of suspended  
1176 sediments, organic nutrients and temperature stress on early life history stages of the coral *Acropora tenuis*.  
1177 *Scientific Reports* 7:44101.
- 1178 Johnson, C. 1992. Settlement and recruitment of *Acanthaster planci* on the Great Barrier Reef: Questions of process  
1179 and scale. *Marine and Freshwater Research* 43:611–627.
- 1180 Jones, R., G. Ricardo, and A. Negri. 2015. Effects of sediments on the reproductive cycle of corals. *Marine Pollution*  
1181 *Bulletin* 100:13–33.
- 1182 Keesing, J. K., and A. R. Halford. 1992. Importance of postsettlement processes for the population dynamics of  
1183 *Acanthaster planci* (L.). *Marine and Freshwater Research* 43:635–651.
- 1184 Keesing, J., and J. Lucas. 1992. Field measurement of feeding and movement rates of the crown-of-thorns starfish  
1185 *Acanthaster planci* (L.). *Journal of Experimental Marine Biology and Ecology* 156:89–104.
- 1186 Kettle, B., and J. Lucas. 1987. Biometric relationships between organ indices, fecundity, oxygen consumption and  
1187 body size in *Acanthaster planci* (L.)(Echinodermata; Asteroidea). *Bulletin of Marine Science* 41:541–551.
- 1188 Kuffner, I. B., L. J. Walters, M. A. Becerro, V. J. Paul, R. Ritson-Williams, and K. S. Beach. 2006. Inhibition of  
1189 coral recruitment by macroalgae and cyanobacteria. *Marine Ecology Progress Series* 323:107–117.
- 1190 Lam, V. Y., M. Chaloupka, A. Thompson, C. Doropoulos, and P. J. Mumby. 2018. Acute drivers influence recent  
1191 inshore Great Barrier Reef dynamics. *Proceedings of the Royal Society B: Biological Sciences* 285:20182063.
- 1192 Lam, V. Y., C. Doropoulos, Y.-M. Bozec, and P. J. Mumby. 2020. Resilience Concepts and Their Application to  
1193 Coral Reefs. *Frontiers in Ecology and Evolution* 8:49.
- 1194 Liu, G., W. J. Skirving, E. F. Geiger, J. L. De La Cour, B. L. Marsh, S. F. Heron, K. V. Tirak, A. E. Strong, and C. M.  
1195 Eakin. 2017. NOAA Coral Reef Watch’s 5km satellite coral bleaching heat stress monitoring product suite  
1196 version 3 and four-month outlook version 4. *Reef Encounter* 32:39–45.
- 1197 Loya, Y., K. Sakai, K. Yamazato, Y. Nakano, H. Sambali, and R. Van Woesik. 2001. Coral bleaching: the winners  
1198 and the losers. *Ecology Letters* 4:122–131.
- 1199 Lucas, J. S. 1984. Growth, maturation and effects of diet in *Acanthasterplanci* (L.)(Asteroidea) and hybrids reared in  
1200 the laboratory. *Journal of Experimental Marine Biology and Ecology* 79:129–147.
- 1201 MacNeil, M. A., C. Mellin, M. S. Pratchett, J. Hoey, K. R. Anthony, A. J. Cheal, I. Miller, H. Sweatman, Z. L.  
1202 Cowan, S. Taylor, and others. 2016. Joint estimation of crown of thorns (*Acanthaster planci*) densities on the  
1203 Great Barrier Reef. *PeerJ* 4:e2310.
- 1204 MacNeil, M. A., C. Mellin, S. Matthews, N. H. Wolff, T. R. McClanahan, M. Devlin, C. Drovandi, K. Mengersen,  
1205 and N. A. Graham. 2019. Water quality mediates resilience on the Great Barrier Reef. *Nature Ecology &*  
1206 *Evolution* 3:620–627.
- 1207 Madin, J. S., A. H. Baird, M. Dornelas, and S. R. Connolly. 2014. Mechanical vulnerability explains size-dependent  
1208 mortality of reef corals. *Ecology Letters* 17:1008–1015.
- 1209 Margvelashvili, N., J. Andrewartha, M. Baird, M. Herzfeld, E. Jones, M. Mongin, F. Rizwi, B. J. Robson, J. Skerratt,  
1210 and K. Wild-Allen. 2018. Simulated fate of catchment-derived sediment on the Great Barrier Reef shelf. *Marine*  
1211 *Pollution Bulletin* 135:954–962.
- 1212 Massel, S. R., and T. J. Done. 1993. Effects of cyclone waves on massive coral assemblages on the Great Barrier  
1213 Reef: meteorology, hydrodynamics and demography. *Coral Reefs* 12:153–166.
- 1214 McManus, J. W., and J. F. Polsenberg. 2004. Coral–algal phase shifts on coral reefs: ecological and environmental  
1215 aspects. *Progress in Oceanography* 60:263–279.
- 1216 Mellin, C., S. Matthews, K. R. Anthony, S. C. Brown, M. J. Caley, K. A. Johns, K. Osborne, M. Puotinen, A.  
1217 Thompson, and N. H. Wolff. 2019. Spatial resilience of the Great Barrier Reef under cumulative disturbance  
1218 impacts. *Global Change Biology* 25:2431–2445.
- 1219 Mellin, C., E. Peterson, M. Puotinen, and B. Schaffelke. 2020. Representation and complementarity of the long-term  
1220 coral monitoring on the Great Barrier Reef. *Ecological Applications* in press.

- 1221 Miller, I., H. Sweatman, A. Cheal, M. Emslie, K. Johns, M. Jonker, and K. Osborne. 2015. Origins and implications  
1222 of a primary crown-of-thorns starfish outbreak in the southern Great Barrier Reef. *Journal of Marine Biology*  
1223 2015.
- 1224 Moran, P. J. 1986. The Acanthaster phenomenon. *Oceanography and Marine Biology: An Annual Review* 24:379–  
1225 480.
- 1226 Moran, P., and G. De'ath. 1992. Estimates of the abundance of the crown-of-thorns starfish *Acanthaster planci* in  
1227 outbreaking and non-outbreaking populations on reefs within the Great Barrier Reef. *Marine Biology* 113:509–  
1228 515.
- 1229 Moran, P. J., R. H. Bradbury, and R. E. Reichelt. 1988. Distribution of recent outbreaks of the crown-of-thorns  
1230 starfish (*Acanthaster planci*) along the Great Barrier Reef: 1985–1986. *Coral Reefs* 7:125–137.
- 1231 Mumby, P. J. 1999. Bleaching and hurricane disturbances to populations of coral recruits in Belize. *Marine Ecology*  
1232 *Progress Series* 190:27–35.
- 1233 Mumby, P. J. 2006. The impact of exploiting grazers (Scaridae) on the dynamics of Caribbean coral reefs. *Ecological*  
1234 *Applications* 16:747–769.
- 1235 Mumby, P. J., A. Hastings, and H. J. Edwards. 2007. Thresholds and the resilience of Caribbean coral reefs. *Nature*  
1236 450:98–101.
- 1237 Mumby, P. J., and R. S. Steneck. 2008. Coral reef management and conservation in light of rapidly evolving  
1238 ecological paradigms. *Trends in Ecology & Evolution* 23:555–563.
- 1239 Mumby, P. J., N. H. Wolff, Y.-M. Bozec, I. Chollett, and P. Halloran. 2014. Operationalizing the resilience of coral  
1240 reefs in an era of climate change. *Conservation Letters* 7:176–187.
- 1241 Mumby, P. J., and K. Anthony. 2015. Resilience metrics to inform ecosystem management under global change with  
1242 application to coral reefs. *Methods in Ecology and Evolution* 6:1088–1096.
- 1243 Okaji, K. 1996. Feeding ecology in the early life stages of the crown-of-thorns starfish, *Acanthaster planci* (L.). PhD  
1244 thesis, James Cook University, Australia.
- 1245 Ortiz, J. C., Y.-M. Bozec, N. H. Wolff, C. Doropoulos, and P. J. Mumby. 2014. Global disparity in the ecological  
1246 benefits of reducing carbon emissions for coral reefs. *Nature Climate Change* 4:1090.
- 1247 Ortiz, J.-C., N. H. Wolff, K. R. Anthony, M. Devlin, S. Lewis, and P. J. Mumby. 2018. Impaired recovery of the  
1248 Great Barrier Reef under cumulative stress. *Science advances* 4:eaar6127.
- 1249 Osborne, K., A. M. Dolman, S. C. Burgess, and K. A. Johns. 2011. Disturbance and the dynamics of coral cover on  
1250 the Great Barrier Reef (1995–2009). *PLoS ONE* 6:e17516.
- 1251 Osborne, K., A. A. Thompson, A. J. Cheal, M. J. Emslie, K. A. Johns, M. J. Jonker, M. Logan, I. R. Miller, and H.  
1252 Sweatman. 2017. Delayed coral recovery in a warming ocean. *Global Change Biology* 23:3869–3881.
- 1253 Paine, R. T., M. J. Tegner, and E. A. Johnson. 1998. Compounded perturbations yield ecological surprises.  
1254 *Ecosystems* 1:535–545.
- 1255 Pratchett, M. S. 1999. An infectious disease in crown-of-thorns starfish on the Great Barrier Reef. *Coral Reefs*  
1256 18:272–272.
- 1257 Pratchett, M. S. 2005. Dynamics of an outbreak population of *Acanthaster planci* at Lizard Island, northern Great  
1258 Barrier Reef (1995–1999). *Coral Reefs* 24:453–462.
- 1259 Pratchett, M. S. 2010. Changes in coral assemblages during an outbreak of *Acanthaster planci* at Lizard Island,  
1260 northern Great Barrier Reef (1995–1999). *Coral Reefs* 29:717–725.
- 1261 Pratchett, M. S., C. F. Caballes, J. A. Rivera-Posada, and H. P. Sweatman. 2014. Limits to understanding and  
1262 managing outbreaks of crown-of-thorns starfish (*Acanthaster* spp.). *Oceanography and Marine Biology: An*  
1263 *Annual Review* 52:133–200.
- 1264 Pratchett, M. S., C. F. Caballes, J. C. Wilmes, S. Matthews, C. Mellin, H. Sweatman, L. E. Nadler, J. Brodie, C. A.  
1265 Thompson, and J. Hoey. 2017. Thirty Years of Research on Crown-of-Thorns Starfish (1986–2016): Scientific  
1266 Advances and Emerging Opportunities. *Diversity* 9: 41.
- 1267 Puotinen, M., J. A. Maynard, R. Beeden, B. Radford, and G. J. Williams. 2016. A robust operational model for  
1268 predicting where tropical cyclone waves damage coral reefs. *Scientific Reports* 6:26009.
- 1269 Puotinen, M., E. Drost, R. Lowe, M. Depczynski, B. Radford, A. Heyward, and J. Gilmour. 2020. Towards  
1270 modelling the future risk of cyclone wave damage to the world's coral reefs. *Global Change Biology* (in press).
- 1271 R Core Team. 2018. R: A language and environment for statistical computing. R Foundation for statistical  
1272 computing, Vienna, Austria.
- 1273 Rasser, M., and B. Riegl. 2002. Holocene coral reef rubble and its binding agents. *Coral Reefs* 21:57–72.

- 1274 Richmond, R. H. 1997. Reproduction and recruitment in corals: critical links in the persistence of reefs. Page Life  
1275 and Death of Coral Reefs. Chapman & Hall, New York.
- 1276 Robson, B., J. Skerratt, M. Baird, C. Davies, M. Herzfeld, E. Jones, M. Mongin, A. Richardson, F. Rizwi, K. Wild-  
1277 Allen, and others. 2020. Enhanced assessment of the eReefs biogeochemical model for the Great Barrier Reef  
1278 using the Concept/State/Process/System model evaluation framework. Environmental Modelling &  
1279 Software:104707.
- 1280 Sammarco, P. W., and J. C. Andrews. 1989. The Helix experiment: differential localized dispersal and recruitment  
1281 patterns in Great Barrier Reef corals. *Limnology and Oceanography* 34:896–912.
- 1282 Sano, M., M. Shimizu, and Y. Nose. 1987. Long-term effects of destruction of hermatypic corals by *Acanthaster*  
1283 *planci* infestation on reef fish communities at Iriomote Island, Japan. *Marine Ecology Progress Series*:191–199.
- 1284 Schaffelke, B., J. Carleton, M. Skuza, I. Zagorskis, and M. J. Furnas. 2012. Water quality in the inshore Great  
1285 Barrier Reef lagoon: Implications for long-term monitoring and management. *Marine Pollution Bulletin*  
1286 65:249–260.
- 1287 Schaffelke, B., C. Collier, F. Kroon, J. Lough, L. Mckenzie, M. Ronan, S. Uthicke, and J. Brodie. 2017. Scientific  
1288 Consensus Statement 2017. A Synthesis of the Science of Land-based Water Quality Impacts on the Great  
1289 Barrier Reef, Chapter 1: The Condition of Coastal and Marine Ecosystems of the Great Barrier Reef and Their  
1290 Responses to Water Quality and Disturbances. State of Queensland.
- 1291 Sweatman, H. H., A. A. Cheal, G. G. Coleman, M. M. Emslie, K. K. Johns, M. M. Jonker, I. I. Miller, and K. K.  
1292 Osborne. 2008. Long-term Monitoring of the Great Barrier reef, Status Report 8. Australian Institute of Marine  
1293 Science, Townsville, Australia.
- 1294 Sweatman, H., S. Delean, and C. Syms. 2011. Assessing loss of coral cover on Australia’s Great Barrier Reef over  
1295 two decades, with implications for longer-term trends. *Coral Reefs* 30:521–531.
- 1296 Thompson, A. A., and A. M. Dolman. 2010. Coral bleaching: one disturbance too many for near-shore reefs of the  
1297 Great Barrier Reef. *Coral Reefs* 29:637–648.
- 1298 Thompson, A., T. Schroeder, V. E. Brando, and B. Schaffelke. 2014. Coral community responses to declining water  
1299 quality: whitsunday Islands, Great Barrier Reef, Australia. *Coral Reefs* 33:923–938.
- 1300 Thompson, A., P. Costello, J. Davidson, M. Logan, and G. Coleman. 2019. Marine Monitoring Program: Annual  
1301 report for inshore coral reef monitoring 2017-18. Australian Institute of Marine Science: Report for the Great  
1302 Barrier Reef Marine Park Authority., Great Barrier Reef Marine Park Authority, Townsville, Australia.
- 1303 Trapon, M. L., M. S. Pratchett, and A. S. Hoey. 2013. Spatial variation in abundance, size and orientation of juvenile  
1304 corals related to the biomass of parrotfishes on the Great Barrier Reef, Australia. *PLoS ONE* 8:e57788.
- 1305 Vercelloni, J., K. Mengersen, F. Ruggeri, and M. J. Caley. 2017. Improved coral population estimation reveals trends  
1306 at multiple scales on Australia’s Great Barrier Reef. *Ecosystems* 20:1337–1350.
- 1307 Viehman, T. S., J. L. Hench, S. P. Griffin, A. Malhotra, K. Egan, and P. N. Halpin. 2018. Understanding differential  
1308 patterns in coral reef recovery: chronic hydrodynamic disturbance as a limiting mechanism for coral  
1309 colonization. *Marine Ecology Progress Series* 605:135–150.
- 1310 Waterhouse, J., J. Brodie, D. Tracey, R. Smith, M. VanderGragt, C. Collier, C. Petus, M. Baird, F. Kroon, and R.  
1311 Mann. 2017. 2017 Scientific Consensus Statement: land use impacts on the Great Barrier Reef water quality and  
1312 ecosystem condition, Chapter 3: the risk from anthropogenic pollutants to Great Barrier Reef coastal and marine  
1313 ecosystems.
- 1314 White, J. W., A. Rassweiler, J. F. Samhuri, A. C. Stier, and C. White. 2014. Ecologists should not use statistical  
1315 significance tests to interpret simulation model results. *Oikos* 123:385–388.
- 1316 Wolfe, K., A. Graba-Landry, S. A. Dworjanyn, and M. Byrne. 2017. Superstars: Assessing nutrient thresholds for  
1317 enhanced larval success of *Acanthaster planci*, a review of the evidence. *Marine Pollution Bulletin* 116:307–314.
- 1318 Wolff, N. H., P. J. Mumby, M. Devlin, and K. Anthony. 2018. Vulnerability of the Great Barrier Reef to climate  
1319 change and local pressures. *Global Change Biology*.
- 1320 Zann, L., J. Brodie, C. Berryman, and M. Naqasima. 1987. Recruitment, ecology, growth and behavior of juvenile  
1321 *Acanthaster planci* (L.) (Echinodermata: Asteroidea). *Bulletin of Marine Science* 41:561–575.
- 1322 Zann, L., J. Brodie, and V. Vuki. 1990. History and dynamics of the crown-of-thorns starfish *Acanthaster planci* (L.)  
1323 in the Suva area, Fiji. *Coral Reefs* 9:135–144.
